# Supplementary material
Source: publisher figshare collection journal article supplement (https://acs.figshare.com/ndownloader/files/4379092)
Supplement: Supplementary file 1 [file 4379092]

# An Organocatalytic Approach to 2-Hydroxyalkyl- and 2-Aminoalkyl Furanes

Łukasz Albrecht, Lars Krogager Ransborg, Björn Gschwend and Karl Anker Jørgensen\*

[\*] Center for Catalysis

Department of Chemistry, Aarhus University

DK-8000 Aarhus C, Denmark

Fax (45) 8919 6199, e-mail: kaj@chem.au.dk

## Supporting Information

|    |                                                                                                                                                                                                                       |      |
|----|-----------------------------------------------------------------------------------------------------------------------------------------------------------------------------------------------------------------------|------|
| 1. | General methods                                                                                                                                                                                                       | S-2  |
| 2. | Enantioselective synthesis of 2-hydroxyalkyl furanes via epoxidation/Feist-Bénary reaction sequence                                                                                                                   | S-3  |
| 3. | Optimization of the enantioselective aziridination/Feist-Bénary reaction sequence using <i>trans</i> -2-hexenal <b>1a</b> and methyl acetoacetate <b>8a</b> as model substrates                                       | S-9  |
| 4. | Enantioselective synthesis of 2-aminoalkyl furanes via aziridination/Feist-Bénary reaction sequence                                                                                                                   | S-10 |
| 5. | Optimization of the enantioselective epoxidation/interrupted Feist-Bénary reaction sequence using <i>trans</i> -2-hexenal <b>1a</b> and methyl or <i>tert</i> -butyl acetoacetates <b>8a,c</b> as model substrates    | S-14 |
| 6. | Enantioselective synthesis of hydroxy dihydrofuranes via epoxidation/interrupted Feist-Bénary reaction sequence                                                                                                       | S-15 |
| 7. | Optimization of the enantioselective aziridination/interrupted Feist-Bénary reaction sequence using <i>trans</i> -2-hexenal <b>1a</b> and methyl or <i>tert</i> -butyl acetoacetates <b>8a,c</b> as model substrates  | S-20 |
| 8. | Enantioselective synthesis of (5 <i>R</i> )-methyl 4-hydroxy-2-methyl-5-(( <i>R</i> )-1-(4-methylphenylsulfonamido)butyl)-4,5-dihydrofuran-3-carboxylate via aziridination/interrupted Feist-Bénary reaction sequence | S-21 |
| 9. | Direct chemical correlation to ( <i>R</i> )-ethyl 5-(1-hydroxyethyl)-2-methylfuran-3-carboxylate <b>2q</b>                                                                                                            | S-24 |

## 1. General Methods.

NMR spectra were acquired on a Varian AS 400 spectrometer, running at 400 MHz for  $^1\text{H}$  and 100 MHz for  $^{13}\text{C}$ , respectively. Chemical shifts ( $\delta$ ) are reported in ppm relative to residual solvent signals ( $\text{CHCl}_3$ , 7.26 ppm for  $^1\text{H}$  NMR,  $\text{CDCl}_3$ , 77.0 ppm for  $^{13}\text{C}$  NMR). The following abbreviations are used to indicate the multiplicity in NMR spectra: s, singlet; d, doublet; t, triplet; q, quartet; quint, quintet; sext, sextet; oct, octet; m, multiplet; bs, broad signal.  $^{13}\text{C}$  NMR spectra were acquired on a broad band decoupled mode. For characterization of diastereomeric mixtures, \*denotes major diastereoisomer, +denotes overlap of signals from both diastereoisomers. Mass spectra were recorded on a micromass LCT spectrometer using electrospray ( $\text{ES}^+$ ) ionization techniques. Analytical thin layer chromatography (TLC) was performed using pre-coated aluminum-backed plates (Merck Kieselgel 60 F254) and visualized by ultraviolet irradiation or  $\text{KMnO}_4$  dip. Optical rotations were measured on a Perkin-Elmer 241 polarimeter. The enantiomeric excess (ee) of the products was determined by chiral stationary phase HPLC (Daicel Chiralpak AS/AD and Daicel Chiralcel OD/OJ/OB columns) or by GC using a chiral Chrompack CP Chiralsil-Dex C $\beta$  column. Unless otherwise noted, analytical grade solvents and commercially available reagents were used without further purification. For flash chromatography (FC) silica gel (Silica gel 60, 230-400 mesh, Fluka) was used. Aldehyde **1g,h** and TsNHOTs were synthesized according to literature.<sup>1</sup>

---

<sup>1</sup> Aldehyde **1g** was synthesized by PCC oxidation of the commercially available (Z)-4-(benzyloxy)but-2-en-1-ol, see: (a) Avi, M.; Gaisberger, R.; Feichtenhofer, S.; Griengl, H. *Tetrahedron* **2009**, 65, 5418. Aldehyde **1h** was synthesized from crotonaldehyde and 4-phenyl-1-butene by cross-methatesis using the 2<sup>nd</sup> generation Grubbs-Hoveyda catalyst, see: (b) Michrowska, A.; List, B. *Nature Chemistry* **2009**, 1, 225. For synthesis of TsNHOTs, see: (c) Albrecht, Ł.; Jiang, H.; Dickmeiss, G.; Gschwend, B.; Hansen, S. G.; Jørgensen, K. A. *J. Am. Chem. Soc.* **2010**, 132, 9188.

## 2. Enantioselective synthesis of 2-hydroxyalkyl furanes via epoxidation/Feist-Bénary reaction sequence

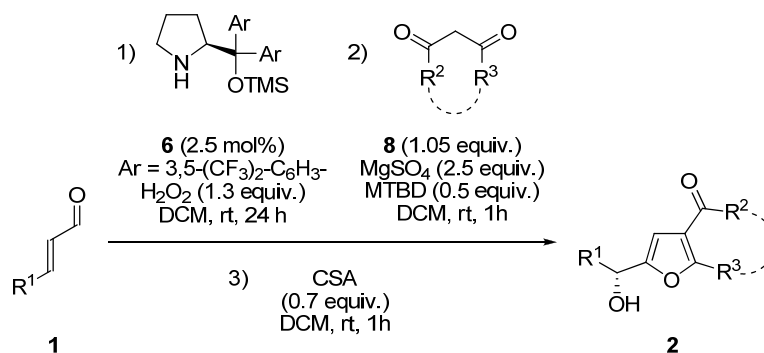

**General procedure:** A glass vial equipped with a magnetic stirring bar was charged with the aldehyde **1** (0.2 mmol, 1 equiv.), the aminocatalyst **6** (0.005 mmol, 0.025 equiv.) and  $\text{CH}_2\text{Cl}_2$  (0.4 mL). After short stirring at rt,  $\text{H}_2\text{O}_2$  (35 wt% in water, 0.26 mmol, 1.3 equiv.) was added. The stirring was maintained at ambient temperature for 24 h to achieve full conversion of the aldehyde **1**. Upon completion of the reaction,  $\text{MgSO}_4$  (0.5 mmol, 2.5 equiv.) was added, the reaction mixture was cooled to 0 °C and the corresponding 1,3-dicarbonyl compound **8** (0.21 mmol, 1.05 equiv.) was added followed by MTBD (0.1 mmol, 0.5 equiv.). After stirring for 1 h at ambient temperature the CSA (0.14 mmol, 0.7 equiv.) was added. The resulting mixture was stirred for additional 1 h at ambient temperature and then directly subjected to FC on silica gel to afford the furane **2**.

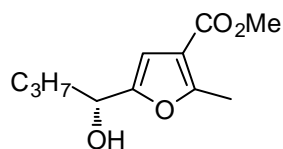

### 2a (*R*)-Methyl 5-(1-hydroxybutyl)-2-methylfuran-3-carboxylate (Entry 1, Table 2)

Following the general procedure **2a** was isolated by FC (gradient:  $\text{CH}_2\text{Cl}_2/\text{Et}_2\text{O}$  100:0 to  $\text{CH}_2\text{Cl}_2/\text{Et}_2\text{O}$  90:10) in 72% yield as a pale yellow oil.  $^1\text{H}$  NMR (400 MHz,  $\text{CDCl}_3$ )  $\delta$  ppm 6.47 (s, 1H), 4.61 (dt,  $J = 6.8, 4.9$  Hz, 1H), 3.81 (s, 3H), 2.56 (s, 3H), 1.82 (d,  $J = 4.9$  Hz, 1H), 1.81 (q,  $J = 7.6$  Hz, 2H), 1.54-1.28 (m, 2H), 0.95 (t,  $J = 7.4$  Hz, 3H).  $^{13}\text{C}$  NMR (100 MHz,  $\text{CDCl}_3$ )  $\delta$  ppm 164.5, 158.8, 154.7, 113.6, 106.6, 67.1, 51.3, 37.3, 18.7, 13.8, 13.8. HR-MS: calculated for  $(\text{M}+\text{Na})^+$ : 235.0946; measured: 235.0948. The ee was determined by HPLC using a Chiralpak AD column (hexane/*i*PrOH 95:5, 1 mL min $^{-1}$ );  $\tau_{\text{major}} = 19.7$  min,  $\tau_{\text{minor}} = 21.3$  min (92% ee).  $[\alpha]_{\text{D}}^{25}$ : +9.2 ( $c = 0.98$ ,  $\text{CHCl}_3$ ).

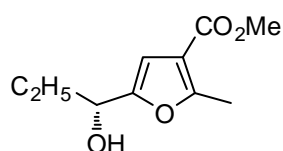

### 2b (*R*)-methyl 5-(1-hydroxypropyl)-2-methylfuran-3-carboxylate (Entry 2, Table 2)

Following the general procedure **2b** was isolated by FC (gradient:  $\text{CH}_2\text{Cl}_2/\text{Et}_2\text{O}$  100:0 to  $\text{CH}_2\text{Cl}_2/\text{Et}_2\text{O}$  90:10) in 72% yield as a pale yellow oil.  $^1\text{H}$  NMR (400 MHz,  $\text{CDCl}_3$ )  $\delta$  ppm 6.46 (s, 1H), 4.52 (t,  $J = 6.8$  Hz, 1H), 3.80 (s, 3H), 2.55 (s, 3H), 2.02 (bs, 1H), 1.93-1.76 (m, 2H), 0.95 (t,  $J = 7.4$  Hz, 3H).  $^{13}\text{C}$  NMR (100 MHz,  $\text{CDCl}_3$ )  $\delta$  ppm 164.5, 158.8, 154.5, 113.6, 106.8, 68.8, 51.3, 28.3, 13.7, 9.9. HR-MS: calculated for  $(\text{M}+\text{Na})^+$ : 221.0790; measured: 221.0787. The ee was determined by HPLC using a Chiralpak AD column (hexane/*i*PrOH 95:5, 1 mL min $^{-1}$ );  $\tau_{\text{major}} = 16.2$  min,  $\tau_{\text{minor}} = 17.8$  min (91% ee).  $[\alpha]_{\text{D}}^{25}$ : +7.0 ( $c = 1.0$ ,  $\text{CHCl}_3$ ).

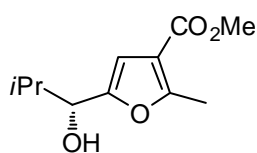

**2c (R)-Methyl 5-(1-hydroxy-2-methylpropyl)-2-methylfuran-3-carboxylate (Entry 3, Table 2)**

Following the general procedure **2c** was isolated by FC (gradient: CH<sub>2</sub>Cl<sub>2</sub>/Et<sub>2</sub>O 100:0 to CH<sub>2</sub>Cl<sub>2</sub>/Et<sub>2</sub>O 90:10) in 62% yield as a pale yellow oil. <sup>1</sup>H NMR (400 MHz, CDCl<sub>3</sub>) δ ppm 6.45 (s, 1H), 4.28 (d, *J* = 6.9 Hz, 1H), 3.80 (s, 3H), 2.55 (s, 3H), 2.07 (oct, *J* = 6.8 Hz, 1H), 1.96 (s, 1H), 1.01 (d, *J* = 6.7 Hz, 3H), 0.86 (d, *J* = 6.8 Hz, 3H). <sup>13</sup>C NMR (100 MHz, CDCl<sub>3</sub>) δ ppm 164.5, 158.6, 153.9, 113.5, 107.3, 73.1, 51.2, 32.9, 18.7, 18.0, 13.7. HR-MS: calculated for (M+Na)<sup>+</sup>: 235.0946; measured: 235.0946. The ee was determined by HPLC using a Chiralpak AD column (hexane/*i*PrOH 95:5, 1 mL min<sup>-1</sup>); τ<sub>major</sub> = 14.3 min, τ<sub>minor</sub> = 16.9 min (94% ee). [α]<sub>D</sub><sup>rt</sup>: +12.8 (c = 1.0, CHCl<sub>3</sub>).

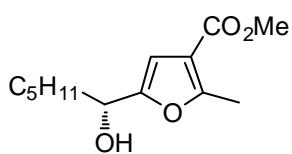

**2d (R)-Methyl 5-(1-hydroxyhexyl)-2-methylfuran-3-carboxylate (Entry 4, Table 2)**

Following the general procedure **2d** was isolated by FC (gradient: CH<sub>2</sub>Cl<sub>2</sub>/Et<sub>2</sub>O 100:0 to CH<sub>2</sub>Cl<sub>2</sub>/Et<sub>2</sub>O 90:10) in 70% yield as a pale yellow oil. <sup>1</sup>H NMR (400 MHz, CDCl<sub>3</sub>) δ ppm 6.45 (s, 1H), 4.58 (t, *J* = 6.9 Hz, 1H), 3.80 (s, 3H), 2.55 (s, 3H), 2.01 (s, 1H), 1.84-1.77 (m, 2H), 1.47-1.37 (m, 2H), 1.34-1.27 (m, 4H), 0.87 (t, *J* = 6.7 Hz, 3H). <sup>13</sup>C NMR (100 MHz, CDCl<sub>3</sub>) δ ppm 164.4, 158.7, 154.7, 113.6, 106.6, 67.4, 51.2, 35.2, 31.5, 25.1, 22.4, 13.9, 13.7. HR-MS: calculated for (M+Na)<sup>+</sup>: 263.1259; measured: 263.1260. The ee was determined by HPLC using a Chiralpak AD column (hexane/*i*PrOH 95:5, 1 mL min<sup>-1</sup>); τ<sub>major</sub> = 14.5 min, τ<sub>minor</sub> = 16.0 min (88% ee). [α]<sub>D</sub><sup>rt</sup>: +11.0 (c = 1.0, CHCl<sub>3</sub>).

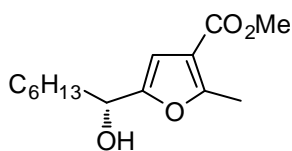

**2e (R)-Methyl 5-(1-hydroxyheptyl)-2-methylfuran-3-carboxylate (Entry 5, Table 2)**

Following the general procedure **2e** was isolated by FC (gradient: CH<sub>2</sub>Cl<sub>2</sub>/Et<sub>2</sub>O 100:0 to CH<sub>2</sub>Cl<sub>2</sub>/Et<sub>2</sub>O 90:10) in 60% yield as a pale yellow oil. <sup>1</sup>H NMR (400 MHz, CDCl<sub>3</sub>) δ ppm 6.44 (s, 1H), 4.57 (t, *J* = 6.9 Hz, 1H), 3.79 (s, 3H), 2.54 (s, 3H), 1.94 (s, 1H), 1.85-1.74 (m, 2H), 1.45-1.22 (m, 8H), 0.86 (t, *J* = 6.7 Hz, 3H). <sup>13</sup>C NMR (100 MHz, CDCl<sub>3</sub>) δ ppm 164.7, 159.0, 154.9, 113.8, 106.8, 67.7, 51.5, 35.5, 31.9, 29.2, 25.6, 22.7, 14.2, 13.9. HR-MS: calculated for (M+Na)<sup>+</sup>: 277.1416; measured: 277.1418. The ee was determined by HPLC using a Chiralpak AD column (hexane/*i*PrOH 95:5, 1 mL min<sup>-1</sup>); τ<sub>major</sub> = 15.5 min, τ<sub>minor</sub> = 17.0 min (91% ee). [α]<sub>D</sub><sup>rt</sup>: +8.0 (c = 1.0, CHCl<sub>3</sub>), +6.0 (c = 0.8, CH<sub>3</sub>OH).

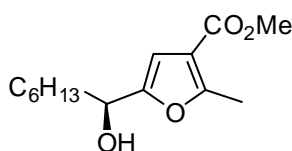

**ent-2e (S)-Methyl 5-(1-hydroxyheptyl)-2-methylfuran-3-carboxylate (Entry 6, Table 2)**

Pale yellow oil. Yield: 60%. Spectral data were identical to compound **2e**. The ee was determined by HPLC using a Chiralpak AD column (hexane/*i*PrOH 95:5, 1 mL min<sup>-1</sup>); τ<sub>major</sub> = 17.0 min, τ<sub>minor</sub> = 15.5 min (90% ee). [α]<sub>D</sub><sup>rt</sup>: -6.0 (c = 0.8, CH<sub>3</sub>OH).

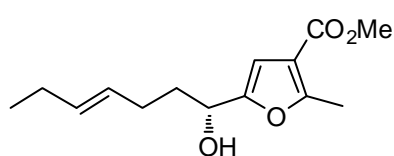

**2f (R,E)-Methyl 5-(1-hydroxyhept-4-en-1-yl)-2-methylfuran-3-carboxylate (Entry 7, Table 2)**

Following the general procedure **2f** was isolated by FC (gradient: CH<sub>2</sub>Cl<sub>2</sub>/Et<sub>2</sub>O 100:0 to CH<sub>2</sub>Cl<sub>2</sub>/Et<sub>2</sub>O 90:10) in 68% yield as a pale yellow oil. <sup>1</sup>H NMR (400 MHz, CDCl<sub>3</sub>) δ ppm 6.39 (s, 1H), 5.48-5.28 (m, 2H), 4.54 (t, *J* = 6.8 Hz, 1H), 3.74 (s, 3H), 2.48 (s, 3H), 2.12-1.88 (m, 5H), 1.81 (q, *J* = 7.3 Hz, 2H), 0.89 (t, *J* = 7.5 Hz, 3H). <sup>13</sup>C NMR (100 MHz, CDCl<sub>3</sub>) δ ppm 164.5, 158.8, 154.6, 133.2, 127.8, 113.6, 106.7, 66.9, 51.3, 35.0, 28.5, 25.5, 13.8, 13.7. HR-MS: calculated for (M+Na)<sup>+</sup>: 275.1259; measured: 275.1257. The ee was determined by HPLC using a Chiralpak AD column (hexane/*i*PrOH 98:2, 1 mL min<sup>-1</sup>); τ<sub>major</sub> = 30.1 min, τ<sub>minor</sub> = 32.1 min (94% ee). [α]<sub>D</sub><sup>rt</sup>: -7.0 (c = 0.98, CHCl<sub>3</sub>).

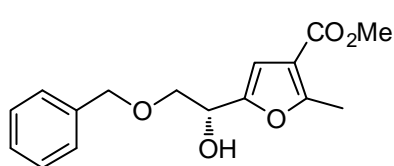

**2g (R)-Methyl 5-(2-(benzyloxy)-1-hydroxyethyl)-2-methylfuran-3-carboxylate (Entry 8, Table 2)**

Following the general procedure **2g** was isolated by FC (gradient: CH<sub>2</sub>Cl<sub>2</sub>/Et<sub>2</sub>O 100:0 to CH<sub>2</sub>Cl<sub>2</sub>/Et<sub>2</sub>O 90:10) in 73% yield as a pale yellow oil. <sup>1</sup>H NMR (400 MHz, CDCl<sub>3</sub>) δ ppm 7.39-7.27 (m, 5H), 6.54 (s, 1H), 4.83 (t, *J* = 5.6 Hz, 1H), 4.62 (d, *J* = 12.0 Hz, 1H), 4.58 (d, *J* = 12.0 Hz, 1H), 3.80 (s, 3H), 3.72 (d, *J* = 5.8 Hz, 2H), 2.86 (bs, 1H), 2.54 (s, 3H). <sup>13</sup>C NMR (100 MHz, CDCl<sub>3</sub>) δ ppm 164.3, 159.1, 151.2, 137.5, 128.8 (2C), 127.9, 127.8 (2C), 113.8, 108.0, 73.5, 72.1, 66.5, 51.3, 13.7. HR-MS: calculated for (M+Na)<sup>+</sup>: 313.1052; measured: 313.1052. The ee was determined by HPLC using a Chiralcel OD column (hexane/*i*PrOH 95:5, 1 mL min<sup>-1</sup>); τ<sub>major</sub> = 30.2 min, τ<sub>minor</sub> = 34.6 min (92% ee). [α]<sub>D</sub><sup>rt</sup>: +4.6 (c = 1.05, CHCl<sub>3</sub>).

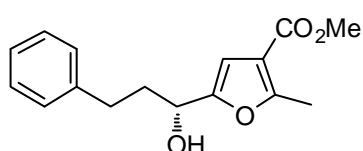

**2h (R)-Methyl 5-(1-hydroxy-3-phenylpropyl)-2-methylfuran-3-carboxylate (Entry 9, Table 2)**

Following the general procedure **2h** was isolated by FC (gradient: CH<sub>2</sub>Cl<sub>2</sub>/Et<sub>2</sub>O 100:0 to CH<sub>2</sub>Cl<sub>2</sub>/Et<sub>2</sub>O 90:10) in 74% yield as a pale yellow oil. <sup>1</sup>H NMR (400 MHz, CDCl<sub>3</sub>) δ ppm 7.33-7.16 (m, 5H), 6.49 (s, 1H), 4.61 (t, *J* = 6.7 Hz, 1H), 3.82 (s, 3H), 2.83-2.65 (m, 2H), 2.56 (s, 3H), 2.21-2.11 (m, 2H), 2.03 (s br, 1H). <sup>13</sup>C NMR (100 MHz, CDCl<sub>3</sub>) δ ppm 164.4, 158.8, 154.5, 141.2, 128.3, 128.3, 125.9, 106.8, 66.4, 51.2, 36.6, 31.6, 13.6. HR-MS: calculated for (M+Na)<sup>+</sup>: 297.1103, measured: 297.1100. The ee was determined by HPLC using a Chiralpak OD column (hexane/*i*PrOH 95:5, 1 mL min<sup>-1</sup>); τ<sub>major</sub> = 32.8 min, τ<sub>minor</sub> = 20.9 min (90% ee). [α]<sub>D</sub><sup>rt</sup>: -7.0 (c = 0.54, CHCl<sub>3</sub>).

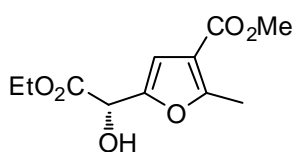

**2i (S)-Methyl 5-(2-ethoxy-1-hydroxy-2-oxoethyl)-2-methylfuran-3-carboxylate (Entry 10, Table 2)**

Following the general procedure **2i** was isolated by FC (gradient: CH<sub>2</sub>Cl<sub>2</sub>/Et<sub>2</sub>O 100:0 to CH<sub>2</sub>Cl<sub>2</sub>/Et<sub>2</sub>O 94:6) in 53% yield as a pale yellow oil. <sup>1</sup>H NMR (400 MHz, CDCl<sub>3</sub>) δ ppm 6.61 (s, 1H), 5.10 (d, *J* = 6.3 Hz, 1H), 4.36-4.21 (m, 2H), 3.81 (s, 3H), 3.39 (d, *J* = 6.4 Hz, 1H), 2.56 (s, 3H), 1.27 (t, *J* = 7.1 Hz, 3H). <sup>13</sup>C NMR (100 MHz, CDCl<sub>3</sub>) δ ppm 171.1, 164.1, 159.8, 148.8, 114.1, 109.6, 66.6, 62.7, 51.4, 14.0, 13.7.

HR-MS: calculated for  $(M+Na)^+$ : 265.0688; measured: 265.0678. The ee was determined by HPLC using a Chiralcel OJ column (hexane/*i*PrOH 90:10, 1 mL min<sup>-1</sup>);  $\tau_{\text{major}}$  = 19.0 min,  $\tau_{\text{minor}}$  = 25.7 min (88% ee).  $[\alpha]_{\text{D}}^{\text{rt}}$ : +56.1 (*c* = 0.98, CHCl<sub>3</sub>).

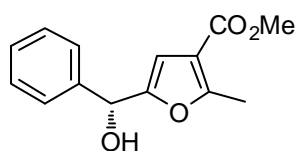

**2j (R)-Methyl 5-(hydroxy(phenyl)methyl)-2-methylfuran-3-carboxylate (Entry 11, Table 2)**

Following the modified general procedure (using DBU 0.2 mmol, 1 equiv. instead of MTBD as a base) **2j** was isolated by FC (gradient: CH<sub>2</sub>Cl<sub>2</sub>/Et<sub>2</sub>O 100:0 to CH<sub>2</sub>Cl<sub>2</sub>/Et<sub>2</sub>O 90:10) in 56% yield as a pale yellow oil. <sup>1</sup>H NMR (400 MHz, CDCl<sub>3</sub>)  $\delta$  ppm 7.49-7.29 (m, 5H), 6.31 (s, 1H), 5.75 (s, 1H), 3.77 (s, 3H), 2.55 (s, 3H), 2.48 (s, 1H). <sup>13</sup>C NMR (100 MHz, CDCl<sub>3</sub>)  $\delta$  ppm 164.3, 159.4, 153.8, 140.1, 128.5 (2C), 128.2, 126.5 (2C), 108.4, 69.8, 51.2, 13.7. HR-MS: calculated for  $(M+Na)^+$ : 269.0790; measured: 269.0796. The ee was determined by HPLC using a Chiralpak AD column (hexane/*i*PrOH 95:5, 1 mL min<sup>-1</sup>);  $\tau_{\text{major}}$  = 22.9 min,  $\tau_{\text{minor}}$  = 25.3 min (88% ee).  $[\alpha]_{\text{D}}^{\text{rt}}$ : -6.0 (*c* = 1.0, CHCl<sub>3</sub>).

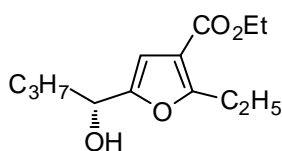

**2k (R)-Methyl 5-(1-hydroxybutyl)-2-methylfuran-3-carboxylate (Entry 1, Table 3)**

Following the general procedure **2k** was isolated by FC (gradient: CH<sub>2</sub>Cl<sub>2</sub>/Et<sub>2</sub>O 100:0 to CH<sub>2</sub>Cl<sub>2</sub>/Et<sub>2</sub>O 90:10) in 58% yield as a pale yellow oil. <sup>1</sup>H NMR (400 MHz, CDCl<sub>3</sub>)  $\delta$  ppm 6.47 (s, 1H), 4.62 (t, *J* = 6.9 Hz, 1H), 4.27 (q, *J* = 7.1 Hz, 2H), 2.99 (q, *J* = 7.6 Hz, 2H), 1.88 (bs, 1H), 1.81 (sext, *J* = 7.0 Hz, 2H), 1.51-1.36 (m, 2H), 1.33 (t, *J* = 7.1 Hz, 3H), 1.24 (t, *J* = 7.6 Hz, 3H), 0.95 (t, *J* = 7.4 Hz, 3H). <sup>13</sup>C NMR (100 MHz, CDCl<sub>3</sub>)  $\delta$  ppm 163.9, 163.5, 154.6, 113.0, 106.6, 67.2, 60.0, 37.3, 21.2, 18.7, 14.3, 13.8, 12.2. HR-MS: calculated for  $(M+Na)^+$ : 263.1259; measured: 263.1255. The ee was determined by HPLC using a Chiralpak AD column (hexane/*i*PrOH 95:5, 1 mL min<sup>-1</sup>);  $\tau_{\text{major}}$  = 12.4 min,  $\tau_{\text{minor}}$  = 13.6 min (86% ee).  $[\alpha]_{\text{D}}^{\text{rt}}$ : +8.0 (*c* = 1.0, CHCl<sub>3</sub>).

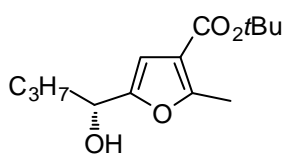

**2l (R)-tert-Butyl 5-(1-hydroxybutyl)-2-methylfuran-3-carboxylate (Entry 2, Table 3)**

Following the general procedure **2l** was isolated by FC (gradient: CH<sub>2</sub>Cl<sub>2</sub>/Et<sub>2</sub>O 100:0 to CH<sub>2</sub>Cl<sub>2</sub>/Et<sub>2</sub>O 90:10) in 70% yield as a pale yellow oil. <sup>1</sup>H NMR (400 MHz, CDCl<sub>3</sub>)  $\delta$  ppm 6.41 (s, 1H), 4.59 (t, *J* = 6.9 Hz, 1H), 2.52 (s, 3H), 1.94 (bs, 1H), 1.79 (q, *J* = 7.0 Hz, 2H), 1.53 (s, 9H), 1.52-1.26 (m, 4H), 0.94 (t, *J* = 7.1 Hz, 3H). <sup>13</sup>C NMR (100 MHz, CDCl<sub>3</sub>)  $\delta$  ppm 163.5, 157.9, 154.4, 115.3, 107.0, 80.5, 67.2, 37.4, 28.3 (3C), 18.7, 13.8, 13.8. HR-MS: calculated for  $(M+Na)^+$ : 277.1416; measured: 277.1414. The ee was determined by HPLC using two Chiralpak AD columns (hexane/*i*PrOH 97:3, 0.5 mL min<sup>-1</sup>);  $\tau_{\text{major}}$  = 63.7 min,  $\tau_{\text{minor}}$  = 67.9 min (88% ee).  $[\alpha]_{\text{D}}^{\text{rt}}$ : +8.1 (*c* = 1.0, CHCl<sub>3</sub>).

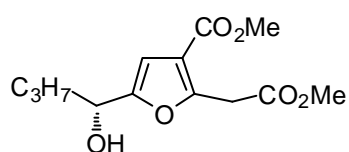

**2m (R)-Methyl 5-(1-hydroxybutyl)-2-(2-methoxy-2-oxoethyl)furan-3-carboxylate (Entry 3, Table 3)**

Following the general procedure **2m** was isolated by FC (gradient: CH<sub>2</sub>Cl<sub>2</sub>/Et<sub>2</sub>O 100:0 to CH<sub>2</sub>Cl<sub>2</sub>/Et<sub>2</sub>O 90:10) in 40% yield as a pale yellow oil. <sup>1</sup>H NMR (400 MHz, CDCl<sub>3</sub>) δ ppm 6.51 (s, 1H), 4.62 (t, *J* = 6.8 Hz, 1H), 4.04 (s, 2H), 3.79 (s, 3H), 3.70 (s, 3H), 2.36 (bs, 1H), 1.79 (q, *J* = 7.5 Hz, 2H), 1.52-1.28 (m, 2H), 0.92 (t, *J* = 7.4 Hz, 1H). <sup>13</sup>C NMR (100 MHz, CDCl<sub>3</sub>) δ ppm 169.1, 163.8, 156.5, 153.3, 115.8, 106.6, 67.0, 52.3, 51.5, 37.3, 33.4, 18.6, 13.7. HR-MS: calculated for (M+Na)<sup>+</sup>: 293.1001; measured: 293.0999. The ee was determined by HPLC using a Chiralcel OJ column (hexane/*i*PrOH 98:2, 1 mL min<sup>-1</sup>); τ<sub>major</sub> = 51.9 min, τ<sub>minor</sub> = 58.1 min (94% ee). [α]<sub>D</sub><sup>rt</sup>: +8.0 (c = 0.68, CHCl<sub>3</sub>).

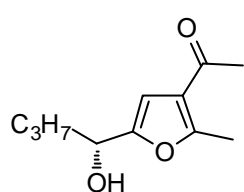

**2n (R)-1-(5-(1-Hydroxybutyl)-2-methylfuran-3-yl)ethanone (Entry 4, Table 3)**

Following the general procedure **2n** was isolated by FC (gradient: CH<sub>2</sub>Cl<sub>2</sub>/Et<sub>2</sub>O 100:0 to CH<sub>2</sub>Cl<sub>2</sub>/Et<sub>2</sub>O 85:15) in 75% yield as a pale yellow oil. <sup>1</sup>H NMR (400 MHz, CDCl<sub>3</sub>) δ ppm 6.43 (s, 1H), 4.61 (t, *J* = 6.8 Hz, 1H), 2.55 (s, 3H), 2.36 (s, 3H), 2.27 (bs, 1H), 1.80 (q, *J* = 7.5 Hz, 2H), 1.53-1.27 (m, 2H), 0.94 (t, *J* = 7.4 Hz, 3H). <sup>13</sup>C NMR (100 MHz, CDCl<sub>3</sub>) δ ppm 194.3, 157.9, 154.8, 121.8, 106.3, 67.1, 37.4, 29.0, 18.7, 14.4, 13.8. HR-MS: calculated for (M+Na)<sup>+</sup>: 219.0997; measured: 219.0997. The ee was determined by HPLC using a Chiralcel OD column (hexane/*i*PrOH 95:5, 1 mL min<sup>-1</sup>); τ<sub>major</sub> = 14.8 min, τ<sub>minor</sub> = 13.6 min (89% ee). [α]<sub>D</sub><sup>rt</sup>: +11.7 (c = 0.98, CHCl<sub>3</sub>).

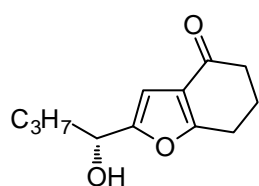

**2o (R)-2-(1-Hydroxybutyl)-6,7-dihydrobenzofuran-4(5H)-one (Entry 5, Table 3)**

Following the general procedure **2o** was isolated by FC (gradient: CH<sub>2</sub>Cl<sub>2</sub>/Et<sub>2</sub>O 100:0 to CH<sub>2</sub>Cl<sub>2</sub>/Et<sub>2</sub>O 90:10) in 52% yield as a pale yellow oil. <sup>1</sup>H NMR (400 MHz, CDCl<sub>3</sub>) δ ppm 6.48 (s, 1H), 4.65 (t, *J* = 6.9 Hz, 1H), 2.86 (t, *J* = 6.3 Hz, 2H), 2.47 (t, *J* = 6.6 Hz, 2H), 2.16 (quint, *J* = 6.4 Hz, 2H), 2.15 (bs, 1H), 1.82 (sext, *J* = 7.2 Hz, 2H), 1.53-1.28 (m, 2H), 0.94 (t, *J* = 7.4 Hz, 3H). <sup>13</sup>C NMR (100 MHz, CDCl<sub>3</sub>) δ ppm 194.5, 166.8, 157.2, 121.5, 102.4, 67.2, 37.5, 37.3, 23.3, 22.5, 18.7, 13.7. HR-MS: calculated for (M+Na)<sup>+</sup>: 231.0997; measured: 231.0991. The ee was determined by HPLC using a Chiralpak AD column (hexane/*i*PrOH 95:5, 1 mL min<sup>-1</sup>); τ<sub>major</sub> = 46.4 min, τ<sub>minor</sub> = 49.1 min (92% ee). [α]<sub>D</sub><sup>rt</sup>: +13.3 (c = 1.0, CHCl<sub>3</sub>).

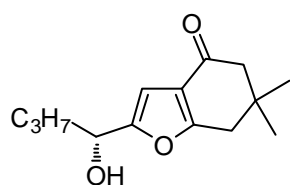

**2p (R)-2-(1-Hydroxybutyl)-6,6-dimethyl-6,7-dihydrobenzofuran-4(5H)-one (Entry 6, Table 3)**

Following the general procedure **2p** was isolated by FC (gradient: CH<sub>2</sub>Cl<sub>2</sub>/Et<sub>2</sub>O 100:0 to CH<sub>2</sub>Cl<sub>2</sub>/Et<sub>2</sub>O 85:15) in 62% yield as a pale yellow oil. <sup>1</sup>H NMR (400 MHz, CDCl<sub>3</sub>) δ ppm 6.48 (s, 1H), 4.65 (t, *J* = 6.7 Hz, 1H), 2.72 (s, 3H), 2.34 (s, 3H), 2.14 (bs, 1H), 1.81 (q, *J* = 7.4 Hz, 1H), 1.55-1.29 (m, 2H), 1.12 (s, 6H), 0.94 (t, *J* = 7.4 Hz, 3H). <sup>13</sup>C NMR (100 MHz, CDCl<sub>3</sub>) δ ppm 194.0, 166.0, 157.6, 120.4, 102.3, 67.3, 51.9, 37.4, 37.3, 35.2, 28.6, 28.6, 18.7, 13.8. HR-MS: calculated for (M+Na)<sup>+</sup>: 259.1310; measured: 259.1311. The

ee was determined by HPLC using a Chiralpak AD column (hexane/*i*PrOH 95:5, 1 mL min<sup>-1</sup>);  $\tau_{\text{major}} = 22.8$  min,  $\tau_{\text{minor}} = 26.0$  min (94% ee).  $[\alpha]_{\text{D}}^{\text{rt}}: +5.6$  (c 1.3, CHCl<sub>3</sub>).



**3. Optimization of the enantioselective aziridination/Feist-Bénary reaction sequence using *trans*-2-hexenal **1a** and methyl acetoacetate **8a** as model substrates**

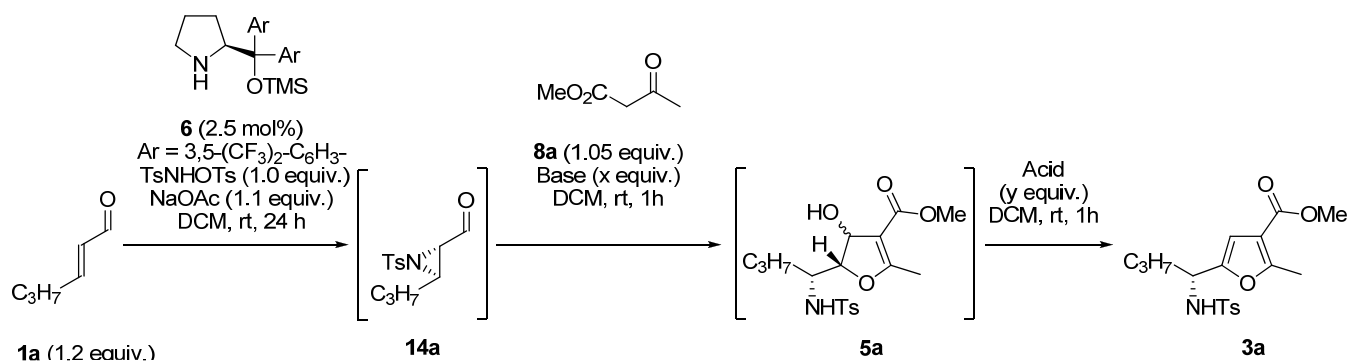

| entry | Base (equiv.) | Acid (equiv.) | yield [%] | ee [%] |
|-------|---------------|---------------|-----------|--------|
| 1     | -             | CSA (1.3)     | -         | -      |
| 2     | MTBD (1)      | CSA (1.3)     | 57        | 95     |
| 3     | MTBD (1)      | CSA (1.8)     | 63        | 95     |
| 4     | MTBD (1)      | CSA (2.3)     | 59        | 95     |
| 5     | MTBD (1)      | TFA (1.8)     | 68        | 95     |
| 6     | DBU (1)       | CSA (1.8)     | 58        | 94     |
| 7     | MTBD (1.5)    | TFA (2.3)     | 61        | 95     |
| 8     | DBU (1.5)     | TFA (2.3)     | 53        | 94     |

#### 4. Enantioselective synthesis of 2-aminoalkyl furanes via aziridination/Feist-Bénary reaction sequence

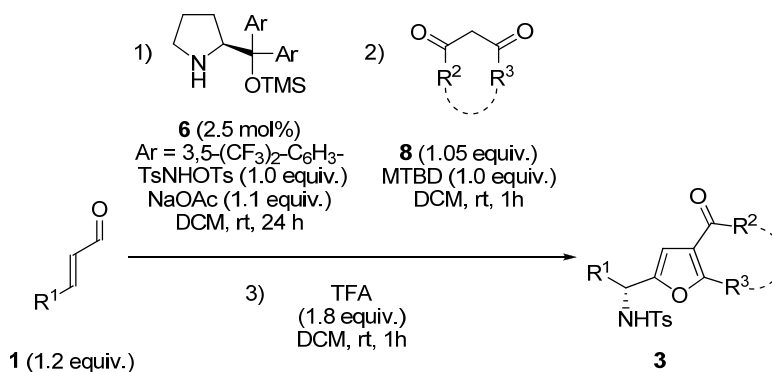

**General procedure:** A glass vial equipped with a magnetic stirring bar was charged with the aldehyde **1** (0.12 mmol, 1.2 equiv), the catalyst **6** (0.0025 mmol, 0.025 equiv) and  $\text{CH}_2\text{Cl}_2$  (0.5 mL). After short stirring at rt, TsNHOTs (0.1 mmol, 1 equiv) was added followed by NaOAc (0.11 mmol, 1.1 equiv.). The stirring was maintained at ambient temperature for 18 h to achieve full conversion of the nucleophile. Upon completion of the reaction, the reaction mixture was cooled to 0 °C and the corresponding 1,3-dicarbonyl compound **8** (0.105 mmol, 1.05 equiv.) was added followed by MTBD (0.1 mmol, 1 equiv.). After stirring for 1 h at ambient temperature the TFA (0.18 mmol, 1.8 equiv.) was added. The resulting mixture was stirred for additional 1 h at ambient temperature and then directly subjected to FC on silica gel to afford the furane **3**.

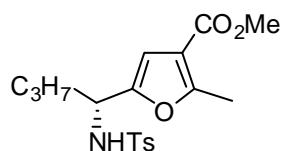

##### **3a** (*R*)-Methyl 2-methyl-5-(1-(4-methylphenylsulfonamido)butyl)furan-3-carboxylate (Entry 1, Table 4)

Following the general procedure **3a** was isolated by FC (gradient: EtOAc/pentane 5:95 to EtOAc/pentane 20:80) in 68% yield as a pale yellow oil.  $^1\text{H}$  NMR (400 MHz,  $\text{CDCl}_3$ )  $\delta$  ppm 7.59 (d,  $J = 8.1$  Hz, 2H), 7.16 (d,  $J = 8.0$  Hz, 2H), 6.12 (s, 1H), 5.02 (d,  $J = 8.6$  Hz, 1H), 4.31 (q,  $J = 7.6$  Hz, 1H), 3.76 (s, 3H), 2.35 (s, 3H), 2.29 (s, 3H), 1.78-1.65 (m, 2H), 1.39-1.17 (m, 2H), 0.85 (t,  $J = 7.3$  Hz, 3H).  $^{13}\text{C}$  NMR (100 MHz,  $\text{CDCl}_3$ )  $\delta$  ppm 164.1, 158.5, 150.8, 143.0, 137.6, 129.1 (2C), 127.0 (2C), 113.3, 107.8, 51.2, 51.2, 36.5, 21.3, 18.8, 13.4, 13.4. HR-MS: calculated for  $(\text{M}+\text{Na})^+$ : 388.1195; measured: 388.1189. The ee was determined by HPLC using a Chiralcel OJ column (hexane/*i*PrOH 95:5, 1 mL min $^{-1}$ );  $\tau_{\text{major}} = 25.9$  min,  $\tau_{\text{minor}} = 23.7$  min (95% ee).  $[\alpha]_{\text{D}}^{25}$ : +47.9 ( $c = 1.0$ ,  $\text{CHCl}_3$ ).

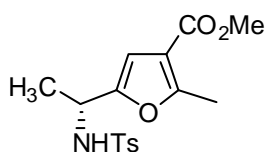

##### **3b** (*R*)-Methyl 2-methyl-5-(1-(4-methylphenylsulfonamido)ethyl)furan-3-carboxylate (Entry 2, Table 4)

Following the general procedure **3b** was isolated by FC (gradient:  $\text{CH}_2\text{Cl}_2/\text{Et}_2\text{O}$  100:0 to  $\text{CH}_2\text{Cl}_2/\text{Et}_2\text{O}$  95:5) in 68% yield as a pale yellow oil.  $^1\text{H}$  NMR (400 MHz,  $\text{CDCl}_3$ )  $\delta$  ppm 7.65 (d,  $J = 8.4$  Hz, 2H), 7.21 (d,  $J = 8.4$  Hz, 2H), 6.20 (s, 1H), 5.05 (d,  $J = 8.2$  Hz, 1H), 4.51-4.43 (m, 1H), 3.76 (s, 3H), 2.38 (s, 3H), 2.32 (s, 3H), 1.42 (d,  $J = 7.0$  Hz, 3H).  $^{13}\text{C}$  NMR (100 MHz,  $\text{CDCl}_3$ )  $\delta$  ppm 173.8, 164.1, 158.7, 151.7,

143.2, 129.3 (2C), 127.0 (2C), 113.4, 107.2, 51.3, 47.0, 21.4, 20.5, 13.4. HR-MS: calculated for (M+Na)<sup>+</sup>: 360.0882; measured: 360.0879. The ee was determined by HPLC using a Chiralpak OJ column (hexane/*i*PrOH 90:10, 1 mL min<sup>-1</sup>);  $\tau_{\text{major}} = 44.4$  min,  $\tau_{\text{minor}} = 39.3$  min (89% ee).  $[\alpha]_{\text{D}}^{25} +66.9$  (c = 1.2, CHCl<sub>3</sub>).

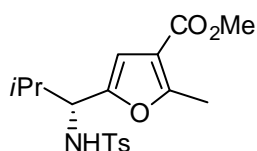

**3c (R)-Methyl 2-methyl-5-(2-methyl-1-(4-methylphenylsulfonamido)propyl)furan-3-carboxylate (Entry 3, Table 4)**

Following the general procedure **3c** was isolated by FC (gradient: EtOAc/pentane 5:95 to EtOAc/pentane 20:80) in 38% yield as a pale yellow oil. <sup>1</sup>H NMR (400 MHz, CDCl<sub>3</sub>)  $\delta$  ppm 7.56 (d, *J* = 8.27 Hz, 2H), 7.15 (d, *J* = 8.51 Hz, 2H), 6.03 (s, 1H), 4.76 (d, *J* = 9.56 Hz, 1H), 4.05 (dd, *J* = 9.54 Hz, 7.24 Hz, 1H), 3.77 (s, 3H), 2.34 (s, 3H), 2.32 (s, 3H), 1.99 (oct, *J* = 6.7 Hz, 1H), 0.97 (d, *J* = 6.74 Hz, 3H), 0.81 (d, *J* = 6.73 Hz, 3H). <sup>13</sup>C NMR (100 MHz, CDCl<sub>3</sub>)  $\delta$  ppm 164.0, 158.3, 150.0, 143.1, 137.4, 129.1 (2C), 127.0 (2C), 113.3, 108.4, 57.3, 51.2, 32.4, 21.3, 18.9, 18.7, 13.4. HR-MS: calculated for (M+Na)<sup>+</sup>: 388.1195; measured: 388.1202. The ee was determined by HPLC using a Chiralcel OD column (hexane/*i*PrOH 95:5, 1 mL min<sup>-1</sup>);  $\tau_{\text{major}} = 17.8$  min,  $\tau_{\text{minor}} = 21.8$  min (95% ee).  $[\alpha]_{\text{D}}^{25} +31.9$  (c = 1.0, CHCl<sub>3</sub>).

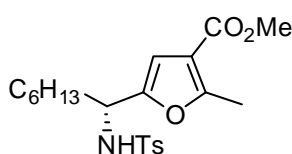

**3d (R)-Methyl 2-methyl-5-(1-(4-methylphenylsulfonamido)heptyl)furan-3-carboxylate (Entry 4, Table 4)**

Following the general procedure **3d** was isolated by FC (gradient: CH<sub>2</sub>Cl<sub>2</sub>/Et<sub>2</sub>O 100:0 to CH<sub>2</sub>Cl<sub>2</sub>/Et<sub>2</sub>O 96:4) in 66% yield as a pale yellow oil. <sup>1</sup>H NMR (400 MHz, CDCl<sub>3</sub>)  $\delta$  ppm 7.59 (d, *J* = 8.3 Hz, 2H), 7.17 (d, *J* = 8.4 Hz, 2H), 6.13 (s, 1H), 4.87 (d, *J* = 8.9 Hz, 1H), 4.29 (q, *J* = 7.7 Hz, 1H), 3.77 (s, 3H), 2.36 (s, 3H), 2.31 (s, 3H), 1.72 (q, *J* = 7.2 Hz, 2H), 1.34-1.10 (m, 8H), 0.84 (t, *J* = 6.8 Hz, 3H). <sup>13</sup>C NMR (100 MHz, CDCl<sub>3</sub>)  $\delta$  ppm 164.1, 158.5, 150.9, 143.1, 137.7, 129.2 (2C), 127.0 (2C), 113.4, 107.9, 107.8, 51.5, 51.2, 34.5, 31.5, 28.6, 25.5, 22.5, 21.3, 14.0, 13.4. HR-MS: calculated for (M+Na)<sup>+</sup>: 430.1664; measured: 430.1671. The ee was determined by HPLC using a Chiralcel OD column (hexane/*i*PrOH 95:5, 1 mL min<sup>-1</sup>);  $\tau_{\text{major}} = 13.3$  min,  $\tau_{\text{minor}} = 18.1$  min (93% ee).  $[\alpha]_{\text{D}}^{25} +42.4$  (c = 1.2, CHCl<sub>3</sub>).

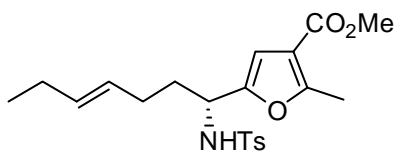

**3e (R,E)-Methyl 2-methyl-5-(1-(4-methylphenylsulfonamido)hept-4-enyl)furan-3-carboxylate (Entry 5, Table 4)**

Following the general procedure **3e** was isolated by FC (gradient: EtOAc/pentane 5:95 to EtOAc/pentane 20:80) in 61% yield as an amorphous off-white solid, mp: 63-68 °C. <sup>1</sup>H NMR (400 MHz, CDCl<sub>3</sub>)  $\delta$  ppm 7.59 (d, *J* = 8.3 Hz, 2H), 7.17 (d, *J* = 8.4 Hz, 2H), 6.13 (s, 1H), 5.47-5.36 (m, 1H), 5.32-5.22 (m, 1H), 4.86 (d, *J* = 8.7 Hz, 1H), 4.32 (q, *J* = 7.7 Hz, 1H), 3.77 (s, 3H), 2.36 (s, 3H), 2.31 (s, 3H), 2.02-1.91 (m, 4H), 1.83-1.75 (m, 2H), 0.94 (t, *J* = 7.4 Hz, 3H). <sup>13</sup>C NMR (100 MHz, CDCl<sub>3</sub>)  $\delta$  ppm 164.1, 158.6, 150.5, 143.1, 137.6, 133.7, 129.2 (2C), 127.1 (2C), 126.9, 113.4, 108.1, 51.3, 50.9, 34.3, 28.5, 25.5, 21.4, 13.8, 13.4. HR-MS: calculated for (M+Na)<sup>+</sup>: 428.1508; measured: 428.1511. The ee was determined by HPLC

using a Chiralcel OD column (hexane/*i*PrOH 95:5, 1 mL min<sup>-1</sup>);  $\tau_{\text{major}} = 19.3$  min,  $\tau_{\text{minor}} = 27.4$  min (90% ee).  $[\alpha]_{\text{D}}^{25}$ : +33.1 (*c* = 0.94, CHCl<sub>3</sub>).

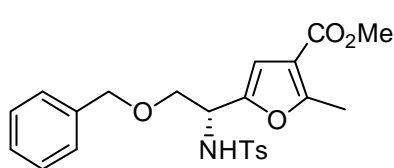

**3f (R)-Methyl 5-(2-(benzyloxy)-1-(4-methylphenylsulfonamido)ethyl)-2-methylfuran-3-carboxylate (Entry 6, Table 4)**

Following the general procedure **3f** was isolated by FC (gradient: CH<sub>2</sub>Cl<sub>2</sub>/Et<sub>2</sub>O 100:0 to CH<sub>2</sub>Cl<sub>2</sub>/Et<sub>2</sub>O 95:5) in 65% yield as a pale yellow oil. <sup>1</sup>H NMR (400 MHz, CDCl<sub>3</sub>)  $\delta$  ppm 7.63 (d, *J* = 8.2 Hz, 2H), 7.38-7.14 (m, 7H), 6.34 (s, 1H), 5.28 (d, *J* = 7.5 Hz, 1H), 4.58-4.50 (m, 1H), 4.44 (s, 2H), 3.78 (s, 3H), 3.67 (dd, *J* = 9.6 Hz, 5.3 Hz, 1H), 3.58 (dd, *J* = 9.6 Hz, 4.9 Hz, 1H), 2.37 (s, 3H), 2.35 (s, 3H). <sup>13</sup>C NMR (100 MHz, CDCl<sub>3</sub>)  $\delta$  ppm 164.0, 158.7, 148.9, 143.2, 137.4, 137.2, 129.3 (2C), 128.4 (2C), 127.9, 127.7 (2C), 127.1 (2C), 113.7, 109.0, 73.2, 70.4, 51.2, 51.0, 21.4, 13.4. HR-MS: calculated for (M+Na)<sup>+</sup>: 466.1300, measured: 466.1302. The ee was determined by HPLC using a Chiralcel OD column (hexane/*i*PrOH 95:5, 1 mL min<sup>-1</sup>);  $\tau_{\text{major}} = 35.5$  min,  $\tau_{\text{minor}} = 42.0$  min (93% ee).  $[\alpha]_{\text{D}}^{25}$ : +49.4 (*c* = 1.0, CHCl<sub>3</sub>).

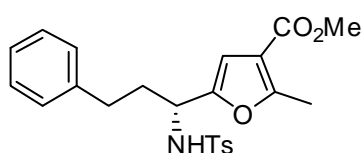

**3g (R)-Methyl 2-methyl-5-(1-(4-methylphenylsulfonamido)-3-phenylpropyl)furan-3-carboxylate (Entry 7, Table 4)**

Following the general procedure **3g** was isolated by FC (gradient: CH<sub>2</sub>Cl<sub>2</sub>/Et<sub>2</sub>O 100:0 to CH<sub>2</sub>Cl<sub>2</sub>/Et<sub>2</sub>O 96:4) in 68% yield as a pale yellow oil. <sup>1</sup>H NMR (400 MHz, CDCl<sub>3</sub>)  $\delta$  ppm 7.58 (d, *J* = 8.1 Hz, 2H), 7.30-7.06 (m, 7H), 6.14 (s, 1H), 5.08 (d, *J* = 8.6 Hz, 1H), 4.38-4.26 (m, 1H), 3.77 (s, 3H), 2.70-2.50 (m, 2H), 2.36 (s, 3H), 2.31 (s, 3H), 2.16-2.00 (m, 2H). <sup>13</sup>C NMR (100 MHz, CDCl<sub>3</sub>)  $\delta$  ppm 164.0, 158.6, 150.4, 143.2, 140.5, 137.5, 129.2 (2C), 128.4 (2C), 128.4 (2C), 127.0 (2C), 126.1, 113.4, 108.2, 51.3, 51.0, 36.0, 31.8, 21.4, 13.4. HR-MS: calculated for (M+Na)<sup>+</sup>: 450.1351, measured: 450.1345. The ee was determined by HPLC using a Chiralpak OD column (hexane/*i*PrOH 95:5, 1 mL min<sup>-1</sup>);  $\tau_{\text{major}} = 15.8$  min,  $\tau_{\text{minor}} = 27.5$  min (91% ee).  $[\alpha]_{\text{D}}^{25}$ : +18.0 (*c* = 1.0, CHCl<sub>3</sub>).

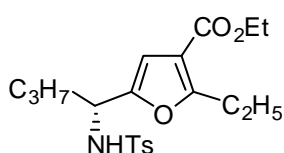

**3h (R)-Ethyl 2-ethyl-5-(1-(4-methylphenylsulfonamido)butyl)furan-3-carboxylate (Entry 8, Table 4)**

Following the general procedure **3h** was isolated by FC (gradient: EtOAc/pentane 5:95 to EtOAc/pentane 20:80) in 55% yield as a pale yellow oil. <sup>1</sup>H NMR (400 MHz, CDCl<sub>3</sub>)  $\delta$  ppm 7.60 (d, *J* = 8.28 Hz, 2H), 7.17 (d, *J* = 8.04 Hz, 2H), 6.12 (s, 1H), 4.77 (d, *J* = 8.85 Hz, 1H), 4.33 (q, *J* = 7.46 Hz, 1H), 4.23 (q, *J* = 7.13 Hz, 2H), 2.76 (q, *J* = 7.58 Hz, 2H), 2.35 (s, 3H), 1.77-1.69 (m, 2H), 1.21-1.39 (m, 2H), 1.32 (t, *J* = 7.13 Hz, 3H), 1.07 (t, *J* = 7.57 Hz, 3H), 0.87 (t, *J* = 7.36 Hz, 3H). <sup>13</sup>C NMR (100 MHz, CDCl<sub>3</sub>)  $\delta$  ppm 163.5, 163.2, 150.5, 143.0, 137.6, 129.2 (2C), 126.9 (2C), 112.7, 107.9, 60.0, 51.2, 36.6, 21.3, 20.9, 18.8, 14.3, 13.4, 12.0. HR-MS: calculated for (M+Na)<sup>+</sup>: 416.1508; measured: 416.1510. The ee was determined by HPLC using a Chiralcel OD column (hexane/*i*PrOH 95:5, 1 mL min<sup>-1</sup>);  $\tau_{\text{major}} = 12.8$  min,  $\tau_{\text{minor}} = 17.1$  min (93% ee).  $[\alpha]_{\text{D}}^{25}$ : +50.9 (*c* = 1.0, CHCl<sub>3</sub>).

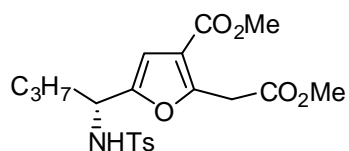

**3i**

**(R)-Methyl**

**2-(2-methoxy-2-oxoethyl)-5-(1-(4-**

**methylphenylsulfonamido)butyl)furan-3-carboxylate (Entry 9, Table 4)**

Following the general procedure **3i** was isolated by FC (gradient: CH<sub>2</sub>Cl<sub>2</sub>/Et<sub>2</sub>O 100:0 to CH<sub>2</sub>Cl<sub>2</sub>/Et<sub>2</sub>O 95:5) in 64% yield as a pale yellow oil. <sup>1</sup>H NMR (400 MHz, CDCl<sub>3</sub>) δ ppm 7.60 (d, *J* = 8.3 Hz, 2H), 7.19 (d, *J* = 7.9 Hz, 2H), 6.13 (s, 1H), 4.65 (d, *J* = 8.5 Hz, 1H), 4.34 (q, *J* = 7.4 Hz, 1H), 3.87 (d, *J* = 17.1 Hz, 1H), 3.80 (d, *J* = 17.1 Hz, 1H), 3.78 (s, 3H), 3.72 (s, 3H), 2.37 (s, 3H), 1.74 (q, *J* = 7.3 Hz, 2H), 1.39-1.20 (m, 2H), 0.87 (t, *J* = 7.3 Hz, 3H). <sup>13</sup>C NMR (100 MHz, CDCl<sub>3</sub>) δ ppm 168.7, 163.4, 153.2, 152.5, 143.1, 137.6, 129.3 (2C), 127.0 (2C), 115.6, 107.7, 52.3, 51.5, 51.1, 36.4, 33.1, 21.4, 18.7, 13.4. HR-MS: calculated for (M+Na)<sup>+</sup>: 446.1249; measured: 446.1241. The ee was determined by HPLC using a Chiralcel OD column (hexane/*i*PrOH 90:10, 1 mL min<sup>-1</sup>); τ<sub>major</sub> = 19.7 min, τ<sub>minor</sub> = 24.3 min (95% ee). [α]<sub>D</sub><sup>rt</sup>: +52.2 (*c* = 1.3, CHCl<sub>3</sub>).

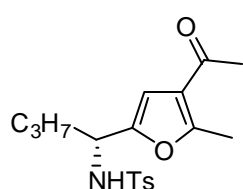

**3j (R)-N-(1-(4-acetyl-5-methylfuran-2-yl)butyl)-4-methylbenzenesulfonamide (Entry 10, Table 4)**

Following the general procedure **3j** was isolated by FC (gradient: CH<sub>2</sub>Cl<sub>2</sub>/Et<sub>2</sub>O 100:0 to CH<sub>2</sub>Cl<sub>2</sub>/Et<sub>2</sub>O 95:5) in 83% yield as a pale yellow oil. <sup>1</sup>H NMR (400 MHz, CDCl<sub>3</sub>) δ ppm 7.59 (d, *J* = 8.2 Hz, 2H), 7.15 (d, *J* = 8.2 Hz, 2H), 6.08 (s, 1H), 5.18 (d, *J* = 8.5 Hz, 1H), 4.37-4.28 (m, 1H), 2.35 (s, 3H), 2.31 (s, 3H), 2.23 (s, 3H), 1.76-1.68 (m, 2H), 1.40-1.18 (m, 2H), 0.86 (t, *J* = 7.3 Hz, 3H). <sup>13</sup>C NMR (100 MHz, CDCl<sub>3</sub>) δ ppm 193.7, 157.6, 150.7, 143.1, 137.7, 129.1 (2C), 127.0 (2C), 121.3, 107.6, 51.2, 36.4, 28.8, 21.3, 18.8, 14.0, 13.4. HR-MS: calculated for (M+Na)<sup>+</sup>: 372.1245, measured: 372.1240. The ee was determined by HPLC using a Chiralcel OD column (hexane/*i*PrOH 95:5, 1 mL min<sup>-1</sup>); τ<sub>major</sub> = 19.7 min, τ<sub>minor</sub> = 25.4 min (95% ee). [α]<sub>D</sub><sup>rt</sup>: +65.4 (*c* = 1.0, CHCl<sub>3</sub>).

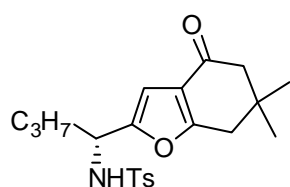

**3k**

**(R)-N-(1-(6,6-dimethyl-4-oxo-4,5,6,7-tetrahydrobenzofuran-2-yl)butyl)-4-methylbenzenesulfonamide (Entry 11, Table 4)**

Following the general procedure **3k** was isolated by FC (gradient: CH<sub>2</sub>Cl<sub>2</sub>/Et<sub>2</sub>O 100:0 to CH<sub>2</sub>Cl<sub>2</sub>/Et<sub>2</sub>O 93:7) in 66% yield as a pale yellow oil. <sup>1</sup>H NMR (400 MHz, CDCl<sub>3</sub>) δ ppm 7.61 (d, *J* = 8.3 Hz, 2H), 7.16 (d, *J* = 8.1 Hz, 2H), 6.15 (s, 1H), 5.04 (d, *J* = 8.7 Hz, 1H), 4.37 (q, *J* = 7.6 Hz, 1H), 2.51 (d, *J* = 17.3 Hz, 1H), 2.42 (d, *J* = 17.2 Hz, 1H), 2.35 (s, 3H), 2.27 (d, *J* = 16.1 Hz, 1H), 2.21 (d, *J* = 16.1 Hz, 1H), 1.79-1.66 (m, 2H), 1.40-1.17 (m, 2H), 1.06 (s, 3H), 1.04 (s, 3H), 0.86 (t, *J* = 7.4 Hz, 3H). <sup>13</sup>C NMR (100 MHz, CDCl<sub>3</sub>) δ ppm 193.4, 165.5, 153.8, 143.1, 137.7, 129.3 (2C), 127.1 (2C), 120.1, 103.3, 51.8, 51.3, 37.1, 36.6, 35.0, 28.6, 28.4, 21.4, 18.8, 13.4. HR-MS: calculated for (M+Na)<sup>+</sup>: 412.1559; measured: 412.1562. The ee was determined by HPLC using a Chiralcel OJ column (hexane/*i*PrOH 90:10, 1 mL min<sup>-1</sup>); τ<sub>major</sub> = 22.2 min, τ<sub>minor</sub> = 17.5 min (91% ee). [α]<sub>D</sub><sup>rt</sup>: +40.7 (*c* 0.95, CHCl<sub>3</sub>).

5. Optimization of the enantioselective epoxidation/interrupted Feist-Bénary reaction sequence using *trans*-2-hexenal **1a** and methyl or *tert*-butyl acetoacetates **8a,c** as model substrates

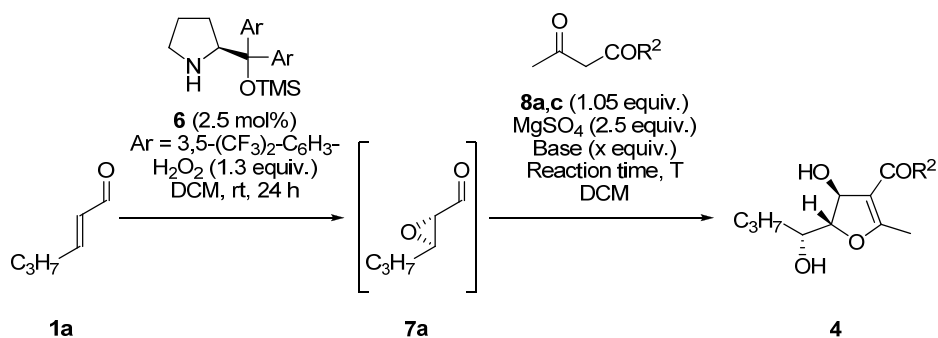

| Entry | <b>8</b> ( $\text{R}^2$ ) | Base (equiv.)               | T      | Reaction time | Conv.<br>(yield [%]) | dr  | ee [%] |
|-------|---------------------------|-----------------------------|--------|---------------|----------------------|-----|--------|
| 1     | <b>8a</b> (OMe)           | DBU                         | RT     | 1h            | >95%                 | 1:1 | nd     |
| 2     | <b>8a</b> (OMe)           | MTBD                        | RT     | 1h            | >95%                 | 1:1 | nd     |
| 3     | <b>8a</b> (OMe)           | NaOAc (3)                   | RT     | 3h            | 72%                  | 3:1 | nd     |
| 4     | <b>8a</b> (OMe)           | <i>t</i> BuOK (1.2)         | RT     | 3h            | >95%                 | 3:1 | nd     |
| 5     | <b>8a</b> (OMe)           | DIPEA (1.2)                 | RT     | 3h            | 87%                  | 2:1 | nd     |
|       | <b>8a</b> (OMe)           | $\text{K}_2\text{CO}_3$ (3) | -20 °C | overnight     | >95%                 | 3:1 | nd     |
| 7     | <b>8a</b> (OMe)           | $\text{K}_2\text{CO}_3$ (3) | RT     | 2h            | >95% (74%)           | 3:1 | 97/98  |
| 8     | <b>8c</b> (OtBu)          | $\text{K}_2\text{CO}_3$ (3) | -20 °C | overnight     | >95%                 | 4:1 | nd     |
| 9     | <b>8c</b> (OtBu)          | $\text{K}_2\text{CO}_3$ (3) | RT     | 2h            | >95% (75%)           | 4:1 | 98/98  |

## 6. Enantioselective synthesis of hydroxy dihydrofuranes via epoxidation/interrupted Feist-Bénary reaction sequence

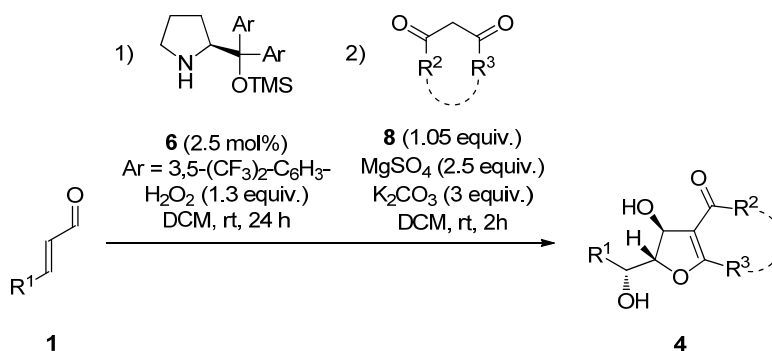

**General procedure:** A glass vial equipped with a magnetic stirring bar was charged with the aldehyde **1** (0.5 mmol, 1 equiv.), the aminocatalyst **6** (0.0125 mmol, 0.025 equiv.) and CH<sub>2</sub>Cl<sub>2</sub> (1.0 mL). After short stirring at rt, H<sub>2</sub>O<sub>2</sub> (35 wt% in water, 0.65 mmol, 1.3 equiv.) was added. The stirring was maintained at ambient temperature for 24 h to achieve full conversion of the aldehyde **1**. Upon completion of the reaction, MgSO<sub>4</sub> (1.25 mmol, 2.5 equiv.) was added, the reaction mixture was cooled to 0 °C and the corresponding 1,3-dicarbonyl compound **8** (0.525 mmol, 1.05 equiv.) was added followed by K<sub>2</sub>CO<sub>3</sub> (1.5 mmol, 3 equiv.). After stirring for 2 h at ambient temperature the reaction mixture was directly subjected to FC on silica gel to afford the dihydrofuran **4**. Interrupted Feist-Bénary products should be handled with care due to the possibility of the dehydration to form furane derivatives.

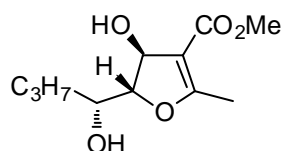

**4a (4S,5R)-Methyl 4-hydroxy-5-((R)-1-hydroxybutyl)-2-methyl-4,5-dihydrofuran-3-carboxylate (Entry 1, Table 5)**

Following the general procedure **4a** was isolated by FC (gradient: CH<sub>2</sub>Cl<sub>2</sub>/Et<sub>2</sub>O 5:1 to CH<sub>2</sub>Cl<sub>2</sub>/Et<sub>2</sub>O 1:4) in 74% yield (3:1 dr). Diastereoisomers were separated by FC.

Major diastereoisomer (pale-yellow oil): <sup>1</sup>H NMR (400 MHz, CDCl<sub>3</sub>) δ ppm 5.15 (s, 1H), 4.28-4.24 (m, 1H), 3.72-3.65 (m, 1H), 3.71 (s, 3H), 3.35 (d, *J* = 2.3 Hz, 1H), 2.69 (d, *J* = 4.7 Hz, 1H), 2.21 (s, 3H), 1.60-1.30 (m, 4H), 0.92 (t, *J* = 6.7 Hz, 3H). <sup>13</sup>C NMR (100 MHz, CDCl<sub>3</sub>) δ ppm 171.5, 166.2, 106.3, 92.0, 73.7, 70.5, 51.0, 34.1, 18.5, 14.5, 13.9. HR-MS: calculated for (M+Na)<sup>+</sup>: 253.1052; measured: 253.1046. The ee was determined by HPLC using a Chiralcel AD column (hexane/*i*PrOH 88:12, 1 mL min<sup>-1</sup>); τ<sub>major</sub> = 11.7 min, τ<sub>minor</sub> = 11.0 min (97% ee). [α]<sub>D</sub><sup>rt</sup>: +124.7 (c = 0.9, CHCl<sub>3</sub>).

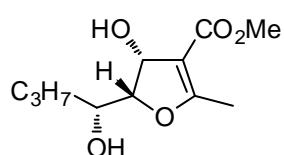

**4a' (4R,5R)-Methyl 4-hydroxy-5-((R)-1-hydroxybutyl)-2-methyl-4,5-dihydrofuran-3-carboxylate (Entry 1, Table 5)**

Minor diastereoisomer (pale-yellow oil): <sup>1</sup>H NMR (400 MHz, CDCl<sub>3</sub>) δ ppm 5.23 (d, *J* = 6.8 Hz, 1H), 4.19 (t, *J* = 7.4 Hz, 1H), 3.74 (s, 3H), 3.25 (d, *J* = 4.4 Hz, 1H), 3.08 (s, 1H), 2.23 (s, 3H), 1.76-1.52 (m, 3H), 1.50-1.36 (m, 1H), 0.95 (t, *J* = 6.9 Hz, 3H). <sup>13</sup>C NMR (100 MHz, CDCl<sub>3</sub>) δ ppm 172.2, 166.0,

106.6, 86.6, 73.6, 69.4, 51.1, 35.8, 18.6, 14.5, 14.0. HR-MS: calculated for (M+Na)<sup>+</sup>: 253.1052; measured: 253.1060. The ee was determined by HPLC using a Chiralcel AD column (hexane/*i*PrOH 90:10, 1 mL min<sup>-1</sup>);  $\tau_{\text{major}}$  = 12.9 min,  $\tau_{\text{minor}}$  = 12.2 min (98% ee).  $[\alpha]_{\text{D}}^{25}$ : +36.8 (c = 1.2, CHCl<sub>3</sub>).

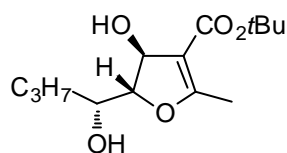

**4b (4*S*,5*R*)-*tert*-Butyl 4-hydroxy-5-((*R*)-1-hydroxybutyl)-2-methyl-4,5-dihydrofuran-3-carboxylate (Entry 2, Table 5)**

Following the general procedure **4b** was isolated by FC (gradient: CH<sub>2</sub>Cl<sub>2</sub> to CH<sub>2</sub>Cl<sub>2</sub>/Et<sub>2</sub>O 1:2) in 75% yield (4:1 dr). Diastereoisomers were separated by FC.

Major diastereoisomer (pale-yellow oil): <sup>1</sup>H NMR (400 MHz, CDCl<sub>3</sub>)  $\delta$  ppm 5.13 (s, 1H), 4.22 (t, *J* = 4.1 Hz, 1H), 3.75-3.65 (m, 1H), 3.33 (s, 1H), 2.68 (d, *J* = 3.7 Hz, 1H), 2.26 (s, 3H), 1.60-1.28 (m, 4H), 1.47 (s, 9H), 0.92 (t, *J* = 6.1 Hz, 3H). <sup>13</sup>C NMR (100 MHz, CDCl<sub>3</sub>)  $\delta$  ppm 169.8, 165.3, 107.7, 91.3, 80.5, 74.0, 70.6, 34.0, 28.3, 18.6, 14.5, 13.9. HR-MS: calculated for (M+Na)<sup>+</sup>: 295.1521; measured: 295.1524. The ee was determined by HPLC using a Chiralcel AD column (hexane/*i*PrOH 97:3, 1 mL min<sup>-1</sup>);  $\tau_{\text{major}}$  = 40.0 min,  $\tau_{\text{minor}}$  = 48.0 min (98% ee).  $[\alpha]_{\text{D}}^{25}$ : +116.8 (c = 1.0, CHCl<sub>3</sub>).

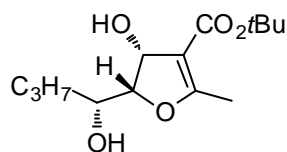

**4b' (4*R*,5*R*)-*tert*-Butyl 4-hydroxy-5-((*R*)-1-hydroxybutyl)-2-methyl-4,5-dihydrofuran-3-carboxylate (Entry 2, Table 5)**

Minor diastereoisomer (pale-yellow oil): <sup>1</sup>H NMR (400 MHz, CDCl<sub>3</sub>)  $\delta$  ppm 5.22 (d, *J* = 7.3 Hz, 1H), 4.17 (t, *J* = 7.6 Hz, 1H), 4.05-3.95 (m, 1H), 3.27 (d, *J* = 4.8 Hz, 1H), 3.05 (s, 1H), 2.19 (s, 3H), 1.75-1.35 (m, 4H), 1.50 (s, 9H), 0.95 (t, *J* = 7.1 Hz, 3H). <sup>13</sup>C NMR (100 MHz, CDCl<sub>3</sub>)  $\delta$  ppm 170.6, 165.3, 107.8, 86.1, 80.6, 74.0, 69.5, 35.8, 28.4, 18.6, 14.4, 14.0. HR-MS: calculated for (M+Na)<sup>+</sup>: 295.1521; measured: 295.1525. The ee was determined by HPLC using a Chiralcel OD column (hexane/*i*PrOH 95:5, 1 mL min<sup>-1</sup>);  $\tau_{\text{major}}$  = 7.1 min,  $\tau_{\text{minor}}$  = 8.2 min (98% ee).  $[\alpha]_{\text{D}}^{25}$ : +29.5 (c = 1.0, CHCl<sub>3</sub>).

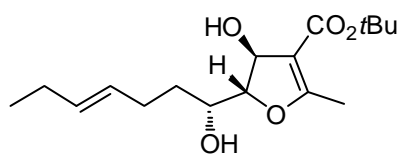

**4c (4*S*,5*R*)-*tert*-Butyl 4-hydroxy-5-((*R*,*E*)-1-hydroxyhept-4-en-1-yl)-2-methyl-4,5-dihydrofuran-3-carboxylate (Entry 3, Table 5)**

Following the general procedure **4c** was isolated by FC (gradient: EtOAc/pentane 5:95 to EtOAc/pentane 20:80) in 86% yield (3:1 dr).

Diastereoisomers were separated by FC.

Major diastereoisomer (pale-yellow oil): <sup>1</sup>H NMR (400 MHz, CDCl<sub>3</sub>)  $\delta$  ppm 5.57-5.34 (m, 2H), 5.14 (d, *J* = 4.0 Hz, 1H), 4.24 (t, *J* = 4.4 Hz, 1H), 3.78-3.69 (m, 1H), 3.19 (bs, 1H), 2.43 (bs, 1H), 2.27-2.18 (m, 1H), 2.17 (s, 3H), 2.15-2.04 (m, 1H), 2.03-1.93 (m, 2H), 1.67-1.50 (m, 2H), 1.48 (s, 9H), 0.94 (t, *J* = 7.5 Hz, 3H). <sup>13</sup>C NMR (100 MHz, CDCl<sub>3</sub>)  $\delta$  ppm 169.8, 165.2, 133.1, 128.1, 107.8, 91.2, 80.5, 74.0, 70.5, 31.7, 28.4, 28.4, 25.5, 14.5, 13.8. HR-MS: calculated for (M+Na)<sup>+</sup>: 335.1834; measured: 335.1828. The ee was determined by HPLC using a Chiralpak AD column (hexane/*i*PrOH 95:5, 1 mL min<sup>-1</sup>);  $\tau_{\text{major}}$  = 16.8 min,  $\tau_{\text{minor}}$  = 19.4 min (95% ee).  $[\alpha]_{\text{D}}^{25}$ : +77.3 (c = 1.0, CHCl<sub>3</sub>).



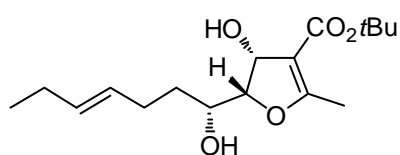

**4c' (4R,5R)-tert-Butyl 4-hydroxy-5-((R,E)-1-hydroxyhept-4-en-1-yl)-2-methyl-4,5-dihydrofuran-3-carboxylate (Entry 3, Table 5)**

Minor diastereoisomer (waxy white solid):  $^1\text{H}$  NMR (400 MHz,  $\text{CDCl}_3$ )  $\delta$  ppm 5.58-5.39 (m, 2H), 5.24 (d,  $J = 7.3$  Hz, 1H), 4.19 (t,  $J = 7.6$  Hz, 1H), 4.05-3.98 (m, 1H), 3.18 (d,  $J = 4.8$  Hz, 1H), 2.84 (bs, 1H), 2.36-2.23 (m, 1H), 2.20 (s, 3H), 2.18-2.08 (m, 1H), 2.06-1.96 (m, 2H), 1.86-1.74 (m, 1H), 1.71-1.62 (m, 1H), 1.51 (s, 9H), 0.97 (t,  $J = 7.4$  Hz, 3H).  $^{13}\text{C}$  NMR (100 MHz,  $\text{CDCl}_3$ )  $\delta$  ppm 170.6, 165.2, 132.6, 128.5, 107.8, 86.0, 80.7, 74.1, 69.3, 33.6, 28.4, 28.4, 25.6, 14.4, 13.9. HR-MS: calculated for  $(\text{M}+\text{Na})^+$ : 335.1834; measured: 335.1826. The ee was determined by HPLC using a Chiralcel OD column (hexane/*i*PrOH 95:5, 1 mL min $^{-1}$ );  $\tau_{\text{major}} = 8.4$  min,  $\tau_{\text{minor}} = 7.3$  min (98% ee).  $[\alpha]_{\text{D}}^{25}$ : +11.4 ( $c = 0.38$ ,  $\text{CHCl}_3$ ).

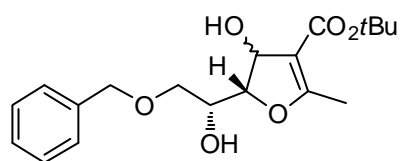

**4d (5S)-tert-Butyl 5-((R)-2-(benzyloxy)-1-hydroxyethyl)-4-hydroxy-2-methyl-4,5-dihydrofuran-3-carboxylate (Entry 4, Table 5)**

Following the general procedure **4d** was isolated by FC (gradient: DCM/EtOAc 10:1 to DCM/EtOAc 7:3) in 60% yield as a pale yellow oil (2:1 dr).  $^1\text{H}$  NMR (400 MHz,  $\text{CDCl}_3$ )  $\delta$  ppm 7.29-7.19 $^+$  (m, 5H), 5.15\* (d,  $J = 2.5$  Hz, 1H), 5.12 (d,  $J = 7.0$  Hz, 1H), 4.56 (d,  $J = 12.1$  Hz, 1H), 4.52 (d,  $J = 8.5$  Hz, 1H), 4.49\* (s, 2H), 4.35-4.29 $^+$  (m, 1H), 3.74-3.47 $^+$  (m, 3H), 3.35 (bs, 2H), 3.21\* (bs, 2H), 2.11 (s, 3H), 2.10\* (s, 3H), 1.43 (s, 9H), 1.43\* (s, 9H).  $^{13}\text{C}$  NMR (100 MHz,  $\text{CDCl}_3$ )  $\delta$  ppm 170.4, 169.6\*, 165.1\*, 165.1, 137.9, 137.6\*, 128.3\* (2C), 128.2 (2C), 127.7 (2C), 127.6\* (2C), 127.6\*, 127.6, 108.2, 107.6\*, 88.0\*, 83.0, 80.4, 80.4\*, 74.8\*, 73.4, 73.4 $^+$ , 71.1, 70.4\*, 69.5\*, 68.7, 28.3 $^+$ , 14.4 $^+$ . HR-MS: calculated for  $(\text{M}+\text{Na})^+$ : 373.1627; measured: 373.1626. The ee for major diastereoisomer was determined by HPLC using a Chiralpak AD column (hexane/*i*PrOH 95:5, 0.5 mL min $^{-1}$ )  $\tau_{\text{major}} = 95.1$  min,  $\tau_{\text{minor}} = 106.1$  min (96% ee).  $[\alpha]_{\text{D}}^{25}$ : +45.8 ( $c = 1.5$ ,  $\text{CHCl}_3$ ).

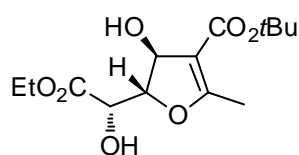

**4e (4S,5S)-tert-Butyl 5-((S)-2-ethoxy-1-hydroxy-2-oxoethyl)-4-hydroxy-2-methyl-4,5-dihydrofuran-3-carboxylate (Entry 5, Table 5)**

Following the general procedure **4e** was isolated by FC (gradient: EtOAc/ $\text{CH}_2\text{Cl}_2$  1:5 to EtOAc/ $\text{CH}_2\text{Cl}_2$  1:2) in 46% yield as a pale yellow oil (7:1 dr). Major diastereoisomer:  $^1\text{H}$  NMR (400 MHz,  $\text{CDCl}_3$ )  $\delta$  ppm 5.14 (dd,  $J = 3.7, 1.0$  Hz, 1H), 4.59 (t,  $J = 3.6$  Hz, 1H), 4.40-4.12 (m, 3H), 3.43 (d,  $J = 6.2$  Hz, 1H), 3.07 (d,  $J = 2.3$  Hz, 1H), 2.51 (s, 3H), 1.46 (s, 9H), 1.25 (t,  $J = 7.2$  Hz, 3H).  $^{13}\text{C}$  NMR (100 MHz,  $\text{CDCl}_3$ )  $\delta$  ppm 171.2, 169.8, 164.8, 108.1, 88.9, 80.5, 73.9, 70.9, 62.2, 28.3, 14.3, 14.0. HR-MS: calculated for  $(\text{M}+\text{Na})^+$ : 325.1263; measured: 325.1261. The ee was determined by HPLC using a Chiralcel AS column (hexane/*i*PrOH 95:5, 1 mL min $^{-1}$ );  $\tau_{\text{major}} = 23.4$  min,  $\tau_{\text{minor}} = 18.1$  min (97% ee).  $[\alpha]_{\text{D}}^{25}$ : +95.4 ( $c = 1.0$ ,  $\text{CHCl}_3$ ).

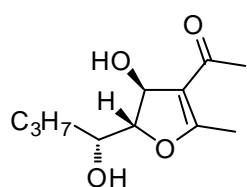

**4f 1-((4*S*,5*R*)-4-hydroxy-5-((*R*)-1-hydroxybutyl)-2-methyl-4,5-dihydrofuran-3-yl)ethanone (Entry 6, Table 5)**

Following the general procedure **4f** was isolated by FC (EtOAc/CH<sub>2</sub>Cl<sub>2</sub> 1:1) in 87% yield (1.6:1 dr). Diastereoisomers were separated by FC.

Major diastereoisomer (pale-yellow oil): <sup>1</sup>H NMR (400 MHz, CDCl<sub>3</sub>) δ ppm 5.26 (d, *J* = 2.9 Hz, 1H), 4.28 (t, *J* = 4.3 Hz, 1H), 3.85-3.78 (m, 1H), 2.93 (bs, 1H), 2.32 (s, 3H), 2.28 (s, 3H), 1.65-1.48 (m, 3H), 1.49-1.35 (m, 1H), 0.96 (t, *J* = 7.1 Hz, 3H). <sup>13</sup>C NMR (100 MHz, CDCl<sub>3</sub>) δ ppm 195.6, 170.9, 116.9, 92.2, 74.3, 70.6, 34.3, 29.0, 18.6, 15.6, 13.9. HR-MS: calculated for (M+Na)<sup>+</sup>: 237.1103; measured: 237.1100. The ee was determined by HPLC using a Chiralcel OJ column (hexane/*i*PrOH 95:5, 1 mL min<sup>-1</sup>); τ<sub>major</sub> = 25.3 min, τ<sub>minor</sub> = 21.9 min (98% ee). [α]<sub>D</sub><sup>rt</sup>: +69.8 (c = 1.01, CHCl<sub>3</sub>).

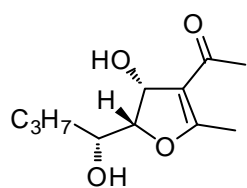

**4f' 1-((4*R*,5*R*)-4-hydroxy-5-((*R*)-1-hydroxybutyl)-2-methyl-4,5-dihydrofuran-3-yl)ethanone (Entry 6, Table 5)**

Minor diastereoisomer (pale-yellow oil): <sup>1</sup>H NMR (400 MHz, CDCl<sub>3</sub>) δ ppm 5.31 (d, *J* = 6.8 Hz, 1H), 4.19 (t, *J* = 7.5 Hz, 1H), 4.08-3.99 (m, 1H), 3.15 (d, *J* = 3.2 Hz, 1H), 3.08 (d, *J* = 4.6 Hz, 1H), 2.32 (s, 3H), 2.28 (s, 3H), 1.80-1.53 (m, 3H), 1.53-1.35 (m, 1H), 0.97 (t, *J* = 7.2 Hz, 3H). <sup>13</sup>C NMR (100 MHz, CDCl<sub>3</sub>) δ ppm 195.4, 171.2, 117.3, 86.4, 74.281, 69.6, 35.8, 28.9, 18.6, 15.7, 14.0. HR-MS: calculated for (M+Na)<sup>+</sup>: 237.1103; measured: 237.1112. The ee was determined by HPLC using a Chiralcel OB column (hexane/*i*PrOH 95:5, 1 mL min<sup>-1</sup>); τ<sub>major</sub> = 7.3 min, τ<sub>minor</sub> = 12.1 min (98% ee). [α]<sub>D</sub><sup>rt</sup>: +48.2 (c = 0.86, CHCl<sub>3</sub>).

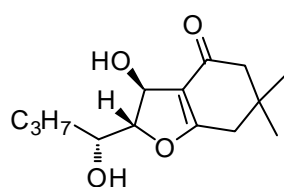

**4g (2*R*,3*S*)-3-hydroxy-2-((*R*)-1-hydroxybutyl)-6,6-dimethyl-2,3,6,7-tetrahydrobenzofuran-4(5*H*)-one (Entry 7, Table 5)**

Following the general procedure **4g** was isolated by FC (gradient: CH<sub>2</sub>Cl<sub>2</sub>/MeOH 100:1 to CH<sub>2</sub>Cl<sub>2</sub>/MeOH 100:5) in 80% yield (2.5:1 dr). Diastereoisomers were separated by FC.

Major diastereoisomer (white solid, mp: 115-119 °C): <sup>1</sup>H NMR (400 MHz, CDCl<sub>3</sub>) δ ppm 5.22 (d, *J* = 3.1 Hz, 1H), 4.44 (t, *J* = 4.1 Hz, 1H), 4.34 (bs, 1H), 3.80-3.64 (m, 2H), 2.36 (d, *J* = 17.7 Hz, 1H), 2.30 (d, *J* = 17.8 Hz, 1H), 2.23 (d, *J* = 16.3 Hz, 1H), 2.14 (d, *J* = 16.3 Hz, 1H), 1.61-1.47 (m, 3H), 1.45-1.31 (m, 1H), 1.10 (s, 3H), 1.03 (s, 3H), 0.92 (t, *J* = 6.9 Hz, 3H). <sup>13</sup>C NMR (100 MHz, CDCl<sub>3</sub>) δ ppm 195.9, 179.9, 115.4, 95.8, 70.5, 69.9, 50.9, 37.8, 34.2, 34.1, 28.6, 28.5, 18.6, 13.9. HR-MS: calculated for (M+Na)<sup>+</sup>: 277.1416; measured: 277.1411. The ee was determined by HPLC using two Chiralcel OD columns (hexane/*i*PrOH 90:10, 0.5 mL min<sup>-1</sup>); τ<sub>major</sub> = 52.8 min, τ<sub>minor</sub> = 47.6 min (98% ee). [α]<sub>D</sub><sup>rt</sup>: +66.0 (c = 0.99, CHCl<sub>3</sub>).

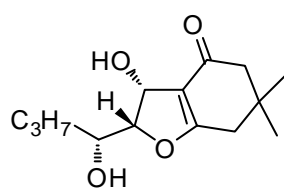

**4g' (2*R*,3*R*)-3-hydroxy-2-((*R*)-1-hydroxybutyl)-6,6-dimethyl-2,3,6,7-tetrahydrobenzofuran-4(5*H*)-one (Entry 7, Table 5)**

Minor diastereoisomer (white solid, mp: 107-111 °C): <sup>1</sup>H NMR (400 MHz, CDCl<sub>3</sub>) δ ppm 5.34 (d, *J* = 6.8 Hz, 1H), 4.32 (t, *J* = 7.4 Hz, 1H), 4.14-3.97 (m, 2H), 3.57 (bs, 1H), 2.39 (d, *J* = 17.7 Hz, 1H), 2.29 (d, *J* = 18.1 Hz, 1H), 2.25 (d, *J* = 16.7 Hz, 1H), 2.21 (d, *J* = 16.4 Hz, 1H), 1.79-1.55 (m, 3H), 1.53-

1.38 (m, 1H), 1.11 (s, 3H), 1.09 (s, 3H), 0.96 (t,  $J = 7.1$  Hz, 3H).  $^{13}\text{C}$  NMR (100 MHz,  $\text{CDCl}_3$ )  $\delta$  ppm 195.6, 179.7, 115.6, 90.0, 69.7, 69.0, 50.9, 37.8, 35.8, 34.1, 28.8, 28.4, 18.6, 14.0. HR-MS: calculated for  $(\text{M}+\text{Na})^+$ : 277.1416; measured: 277.1425.  $[\alpha]_{\text{D}}^{25}$ : +36.7 ( $c = 1.02$ ,  $\text{CHCl}_3$ ).

**7. Optimization of the enantioselective aziridination/interrupted Feist-Bénary reaction sequence using *trans*-2-hexenal **1a** and methyl or *tert*-butyl acetoacetates **8a,c** as model substrates**

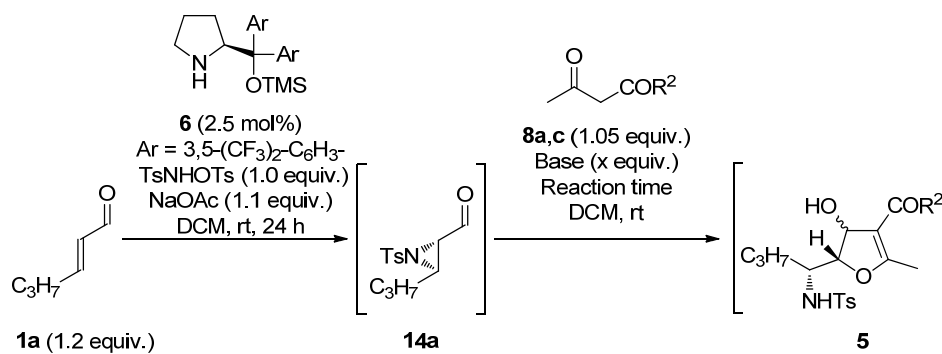

| Entry | <b>6</b> (R <sup>2</sup> ) | Base (equiv.)                       | Reaction time | Conv.<br>(yield [%]) | dr    | ee [%] |
|-------|----------------------------|-------------------------------------|---------------|----------------------|-------|--------|
| 1     | <b>8a</b> (OMe)            | MTBD (1)                            | 1h            | >95%                 | 2:1   | nd     |
| 2     | <b>8a</b> (OMe)            | K <sub>2</sub> CO <sub>3</sub> (1)  | 1h            | >95%                 | 1:1   | nd     |
| 3     | <b>8a</b> (OMe)            | DIPEA (1)                           | 3h            | >95% (70)            | 2:1   | 98/96  |
| 4     | <b>8a</b> (OMe)            | Imidazole (3)                       | 1h            | >95%                 | 2:1   | nd     |
| 5     | <b>8a</b> (OMe)            | NEt <sub>3</sub> (1)                | 1.5h          | >95%                 | 2:1   | nd     |
| 6     | <b>8c</b> (OtBu)           | MTBD (1)                            | 1h            | >95%                 | 1:1   | nd     |
| 7     | <b>8c</b> (OtBu)           | DIPEA (1)                           | 3h            | >95%                 | 1.5:1 | nd     |
| 8     | <b>8c</b> (OtBu)           | Cs <sub>2</sub> CO <sub>3</sub> (1) | 1h            | >95%                 | 1.5:1 | nd     |

## 8. Enantioselective synthesis of hydroxy dihydrofuranes **5** via aziridination/interrupted Feist-Bénary reaction sequence

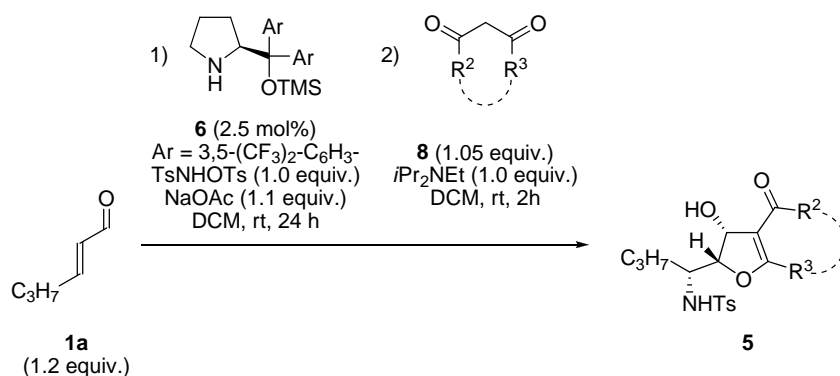

A glass vial equipped with a magnetic stirring bar was charged with the aldehyde **1a** (0.24 mmol, 1.2 equiv), the catalyst **6** (0.005 mmol, 0.025 equiv) and CH<sub>2</sub>Cl<sub>2</sub> (1.0 mL). After short stirring at rt, TsNHOTs (0.2 mmol, 1 equiv) was added followed by NaOAc (0.22 mmol, 1.1 equiv.). The stirring was maintained at ambient temperature for 18 h to achieve full conversion of the nucleophile. Upon completion of the reaction, the reaction mixture was cooled to 0 °C and the corresponding 1,3-dicarbonyl compound **8** (0.21 mmol, 1.05 equiv.) was added followed by *i*Pr<sub>2</sub>NEt (0.2 mmol, 1.0 equiv.). After stirring for 2 h at ambient temperature the reaction mixture was directly subjected to FC on silica gel to afford the dihydrofuran **5**. Interrupted Feist-Bénary products should be handled with care due to the possibility of the dehydration to form furane derivatives.

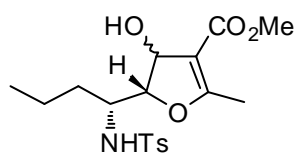

### **5a** (5*R*)-Methyl 4-hydroxy-2-methyl-5-((*R*)-1-(4-methylphenylsulfonamido)butyl)-4,5-dihydrofuran-3-carboxylate (Entry 8, Table 5)

Following the general procedure **5a** was isolated by FC (EtOAc/pentane 20:80 to EtOAc/pentane 40:60) in 70% yield as a pale yellow oil (2:1 dr).

<sup>1</sup>H NMR (400 MHz, CDCl<sub>3</sub>) δ ppm 7.73\* (d, *J* = 8.3 Hz, 2H), 7.70 (d, *J* = 8.3 Hz, 2H), 7.25<sup>+</sup> (d, *J* = 8.3 Hz, 2H), 5.88\* (d, *J* = 9.5 Hz, 1H), 5.78 (d, *J* = 9.0 Hz, 1H), 5.42 (s, 1H), 5.14\* (d, *J* = 7.0 Hz, 1H), 4.22\* (dd, *J* = 6.8, 4.7 Hz, 1H), 4.07-4.01 (m, 1H), 3.97-3.89\* (m, 1H), 3.71\* (s, 3H), 3.68 (s, 3H), 3.54-3.46 (m, 1H), 3.01\* (d, *J* = 2.0 Hz, 1H), 2.80 (d, *J* = 1.5 Hz, 1H), 2.40\* (s, 3H), 2.39 (s, 3H), 2.12 (s, 3H), 1.84\* (s, 3H), 1.73-1.15<sup>+</sup> (m, 4H), 0.88\* (t, *J* = 7.2 Hz, 3H), 0.81 (t, *J* = 6.9 Hz, 3H). <sup>13</sup>C NMR (100 MHz, CDCl<sub>3</sub>) δ ppm 171.9\*, 168.2, 166.5, 165.8\*, 143.0, 142.6\*, 139.3\*, 138.2, 129.5 (2C), 129.3\* (2C), 127.0 (2C), 126.9\* (2C), 102.3, 102.0\*, 84.8<sup>+</sup>, 73.5<sup>+</sup>, 54.3, 53.9\*, 51.2, 51.1\*, 34.6\*, 34.4, 21.5, 21.4\*, 19.3\*, 19.0, 14.8, 13.9\*, 13.8\*, 13.6. HR-MS: calculated for (M+Na)<sup>+</sup>: 406.1300; measured: 406.1310. The ee was determined by HPLC using a Chiralpak AD column (hexane/*i*PrOH 90:10, 1 mL min<sup>-1</sup>). Major diastereoisomer: τ<sub>major</sub> = 26.7 min, τ<sub>minor</sub> = 23.4 min (98% ee). Minor diastereoisomer: τ<sub>major</sub> = 109.1 min, τ<sub>minor</sub> = 62.9 min (96% ee). [α]<sub>D</sub><sup>rt</sup>: +45.9 (c = 1.5, CHCl<sub>3</sub>).

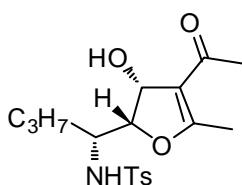

**5b** *N-((R)-1-((2R,3R)-4-acetyl-3-hydroxy-5-methyl-2,3-dihydrofuran-2-yl)butyl)-4-methylbenzenesulfonamide (Entry 9, Table 5)*

Following the general procedure **5b** was isolated by FC (gradient: EtOAc/CH<sub>2</sub>Cl<sub>2</sub> 4:6 to EtOAc/CH<sub>2</sub>Cl<sub>2</sub> 7:3) in 91% yield (2.5:1 dr). Diastereoisomers were separated by FC.

Major diastereoisomer (white solid, mp: 118-124 °C): <sup>1</sup>H NMR (400 MHz, CDCl<sub>3</sub>) δ ppm 7.74 (d, *J* = 8.3 Hz, 2H), 7.27 (d, *J* = 8.0 Hz, 2H), 5.73 (d, *J* = 9.3 Hz, 1H), 5.20 (dd, *J* = 6.5, 2.0 Hz, 1H), 4.17 (t, *J* = 6.0 Hz, 1H), 3.95-3.87 (m, 1H), 3.48 (s, 1H), 2.41 (s, 3H), 2.27 (s, 3H), 1.97 (s, 3H), 1.65-1.49 (m, 2H), 1.28-1.16 (m, 2H), 0.83 (t, *J* = 7.2 Hz, 3H). <sup>13</sup>C NMR (100 MHz, CDCl<sub>3</sub>) δ ppm 195.2, 170.8, 143.0, 138.9, 129.4, 127.0, 117.5, 85.0, 73.8, 53.3, 34.4, 28.8, 21.4, 19.0, 15.0, 13.7. HR-MS: calculated for (M+Na)<sup>+</sup>: 390.1351; measured: 390.1355. The ee was determined by HPLC using a Chiralpak AD column (hexane/*i*PrOH 95:5, 1 mL min<sup>-1</sup>); τ<sub>major</sub> = 79.5 min, τ<sub>minor</sub> = 64.5 min (98% ee). [α]<sub>D</sub><sup>rt</sup>: +82.7 (c = 1.01, CHCl<sub>3</sub>).

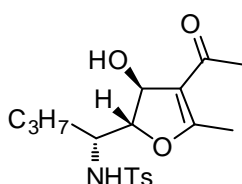

**5b'** *N-((R)-1-((2R,3S)-4-acetyl-3-hydroxy-5-methyl-2,3-dihydrofuran-2-yl)butyl)-4-methylbenzenesulfonamide (Entry 9, Table 5)*

Minor diastereoisomer (pale-yellow oil): <sup>1</sup>H NMR (400 MHz, CDCl<sub>3</sub>) δ ppm 7.74 (d, *J* = 8.3 Hz, 2H), 7.29 (d, *J* = 8.0 Hz, 2H), 5.10 (d, *J* = 8.7 Hz, 1H), 5.06 (d, *J* = 3.2 Hz, 1H), 4.25 (dd, *J* =

5.4, 3.6 Hz, 1H), 3.53-3.41 (m, 1H), 3.16 (bs, 1H), 2.42 (s, 3H), 2.26 (s, 3H), 2.14 (s, 3H), 1.44-1.26 (m, 4H), 0.76 (t, *J* = 7.2 Hz, 3H). <sup>13</sup>C NMR (100 MHz, CDCl<sub>3</sub>) δ ppm 195.3, 170.9, 143.5, 138.2, 129.7, 127.0, 116.7, 90.2, 75.0, 54.8, 32.6, 29.0, 21.5, 18.2, 15.3, 13.7. HR-MS: calculated for (M+Na)<sup>+</sup>: 390.1351 measured: 390.1350. The ee was determined by HPLC using a Chiralpak AD column (hexane/*i*PrOH 95:5, 1 mL min<sup>-1</sup>); τ<sub>major</sub> = 93.6 min, τ<sub>minor</sub> = 83.3 min (92% ee). [α]<sub>D</sub><sup>rt</sup>: +92.9 (c = 1.02, CHCl<sub>3</sub>).

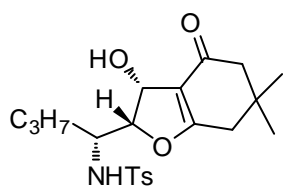

**5c** *N-((R)-1-((2R,3R)-3-hydroxy-6,6-dimethyl-4-oxo-2,3,4,5,6,7-hexahydrobenzofuran-2-yl)butyl)-4-methylbenzenesulfonamide (Entry 10, Table 5)*

Following the general procedure **5c** was isolated by FC (gradient: EtOAc/CH<sub>2</sub>Cl<sub>2</sub> 4:6 to EtOAc/CH<sub>2</sub>Cl<sub>2</sub> 7:3) in 80% yield (1:1 dr). Diastereoisomers were separated by FC.

First diastereoisomer (pale-yellow oil): <sup>1</sup>H NMR (400 MHz, CDCl<sub>3</sub>) δ ppm 7.74 (d, *J* = 8.3 Hz, 2H), 7.26 (d, *J* = 7.9 Hz, 2H), 5.92 (d, *J* = 9.5 Hz, 1H), 5.27 (d, *J* = 6.8 Hz, 1H), 4.40 (dd, *J* = 6.9, 4.3 Hz, 1H), 4.07-3.98 (m, 1H), 3.67 (bs, 1H), 2.42 (s, 3H), 2.21-1.99 (m, 4H), 1.76-1.43 (m, 4H), 1.02 (s, 3H), 0.99 (s, 3H), 0.90 (t, *J* = 7.2 Hz, 3H). <sup>13</sup>C NMR (100 MHz, CDCl<sub>3</sub>) δ ppm 195.2, 179.1, 142.4, 139.7, 129.3, 127.0, 115.6, 87.9, 70.0, 54.3, 50.8, 37.1, 34.5, 33.9, 28.9, 28.1, 21.4, 19.4, 13.7. HR-MS: calculated for (M+Na)<sup>+</sup>: 430.1664; measured: 430.1672. The ee was determined by HPLC using a Chiralcel OJ column (hexane/*i*PrOH 90:10, 1 mL min<sup>-1</sup>); τ<sub>major</sub> = 30.1 min, τ<sub>minor</sub> = 18.5 min (94% ee). [α]<sub>D</sub><sup>rt</sup>: +50.6 (c = 1.02, CHCl<sub>3</sub>).

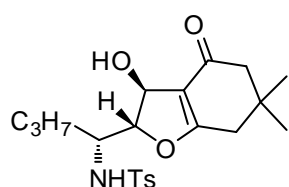

**5c' *N*-((*R*)-1-((2*R*,3*S*)-3-hydroxy-6,6-dimethyl-4-oxo-2,3,4,5,6,7-hexahydrobenzofuran-2-yl)butyl)-4-methylbenzenesulfonamide (Entry 10, Table 5)**

Second diastereoisomer (white foam):  $^1\text{H}$  NMR (400 MHz,  $\text{CDCl}_3$ )  $\delta$  ppm 7.71 (d,  $J = 8.2$  Hz, 2H), 7.27 (d,  $J = 7.4$  Hz, 2H), 5.61 (d,  $J = 9.0$  Hz, 1H), 5.20 (d,  $J = 2.2$  Hz, 1H), 4.49 (t,  $J = 3.7$  Hz, 1H), 3.99 (bs, 1H), 3.65-3.56 (m, 1H), 2.41 (s, 3H), 2.32-2.09 (m, 4H), 1.47-1.28 (m, 2H), 1.28-1.18 (m, 2H), 1.09 (s, 3H), 1.06 (s, 3H), 0.74 (t,  $J = 7.2$  Hz, 3H).  $^{13}\text{C}$  NMR (100 MHz,  $\text{CDCl}_3$ )  $\delta$  ppm 196.0, 180.4, 143.4, 138.8, 129.8, 127.1, 115.4, 94.2, 70.7, 55.2, 51.1, 37.8, 34.3, 32.6, 28.8, 28.8, 21.7, 18.8, 13.9. HR-MS: calculated for  $(\text{M}+\text{Na})^+$ : 430.1664; measured: 430.1664. The ee was determined by HPLC using a Chiralcel OD column (hexane/*i*PrOH 90:10, 1 mL min $^{-1}$ );  $\tau_{\text{major}} = 31.2$  min,  $\tau_{\text{minor}} = 18.3$  min (97% ee).  $[\alpha]_{\text{D}}^{25}$ : +68.2 ( $c = 0.99$ ,  $\text{CHCl}_3$ ).

## 9. Direct chemical correlation to (*R*)-ethyl 5-(1-hydroxyethyl)-2-methylfuran-3-carboxylate **2q**

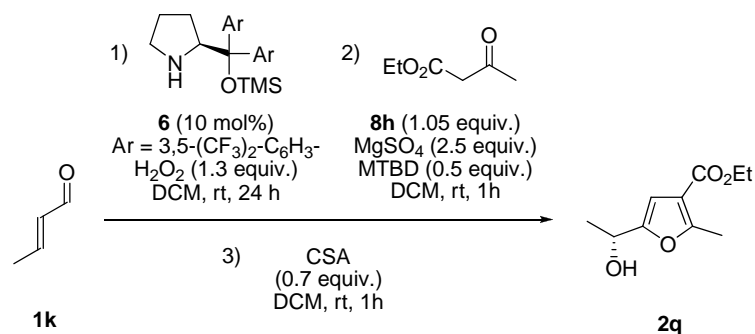

### **2q** (*R*)-Ethyl 5-(1-hydroxyethyl)-2-methylfuran-3-carboxylate (Scheme 5)

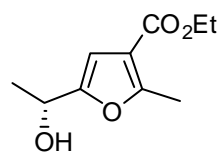

Following the modified general procedure for enantioselective synthesis of 2-hydroxy alkylfuranes via epoxidation/Feist-Bénary reaction sequence (using 10 mol% of catalyst **6** and crotonaldehyde **1k** and ethyl acetoacetate **8h** as starting materials) **2q** was isolated by FC

(gradient: pentane/EtOAc 90:10 to pentane/EtOAc 80:20) in 70% yield as a pale yellow oil. <sup>1</sup>H NMR (400 MHz, CDCl<sub>3</sub>) δ ppm 6.47 (s, 1H), 4.80 (q, *J* = 6.5 Hz, 1H), 4.26 (q, *J* = 7.1 Hz, 2H), 2.55 (s, 3H), 2.06 (bs, 1H), 1.52 (d, *J* = 6.6 Hz, 3H), 1.33 (t, *J* = 7.1 Hz, 3H). <sup>13</sup>C NMR (100 MHz, CDCl<sub>3</sub>) δ ppm 164.1, 158.7, 155.3, 113.9, 106.1, 63.3, 60.1, 21.1, 14.3, 13.8. HR-MS: calculated for (M+Na)<sup>+</sup>: 221.0790; measured: 221.0800. The ee was determined by HPLC using a Chiralpak AD column (hexane/*i*PrOH 95:5, 1 mL min<sup>-1</sup>); τ<sub>major</sub> = 17.9 min, τ<sub>minor</sub> = 20.8 min (89% ee). [α]<sub>D</sub><sup>rt</sup>: +5.9 (c = 1.0, CHCl<sub>3</sub>) (lit.<sup>2</sup> [α]<sub>D</sub><sup>rt</sup>: +8.8 (c = 1.0, CHCl<sub>3</sub>), 89% ee).

<sup>2</sup> (a) Adam, W.; Korb, M. N. *Tetrahedron: Asymmetry* **1997**, *8*, 1131. (b) Adam, W.; Humpf, H. U.; Korb, M. N.; Schreier, P. *Tetrahedron: Asymmetry* **1997**, *8*, 3555.
